# Thermal proteome profiling of breast cancer cells reveals proteasomal activation by CDK4/6 inhibitor palbociclib

Teemu P. Miettinen<sup>1,2,3,4\*</sup>, Julien Peltier<sup>2,5\*</sup>, Anetta Härtlova<sup>2,5</sup>, Marek Gierliński<sup>6</sup>, Valerie M.  
Jansen<sup>7,8</sup>, Matthias Trost<sup>2,5†</sup> and Mikael Björklund<sup>1†</sup>

<sup>1</sup> Division of Cell and Developmental Biology, University of Dundee, Dundee, United Kingdom

<sup>2</sup> MRC Protein Phosphorylation and Ubiquitylation Unit, University of Dundee, Dundee, United Kingdom

<sup>3</sup> MRC Laboratory for Molecular Cell Biology, University College London, London, United Kingdom

<sup>4</sup> Koch Institute for Integrative Cancer Research, Massachusetts Institute of Technology, Cambridge, United States of America

<sup>5</sup> Institute for Cell and Molecular Biosciences, Newcastle University, Newcastle upon Tyne, United Kingdom

<sup>6</sup> Division of Computational Biology, University of Dundee, Dundee, United Kingdom

<sup>7</sup> Division of Hematology-Oncology, Vanderbilt University Medical Center, Nashville, United States of America

<sup>8</sup> present address: Eli Lilly and Company, Indianapolis, United States of America

\*Equal contribution

†Correspondence to: [mikael.bjorklund.lab@gmail.com](mailto:mikael.bjorklund.lab@gmail.com), [matthias.trost@ncl.ac.uk](mailto:matthias.trost@ncl.ac.uk)

**Conflicts of Interest:** The authors declare no conflicts of interest.

## Abstract

Palbociclib is a CDK4/6 inhibitor approved for metastatic estrogen receptor positive breast cancer. In addition to G1 cell cycle arrest, palbociclib treatment results in cell senescence, a phenotype that are not readily explained by CDK4/6 inhibition. In order to identify a molecular mechanism responsible for palbociclib-induced senescence, we performed thermal proteome profiling of MCF7 breast cancer cells. In addition to affecting known CDK4/6 targets, palbociclib induces a thermal stabilization of the 20S proteasome, despite not directly binding to it. We further show that palbociclib treatment increases proteasome activity independently of the ubiquitin pathway. This leads to cellular senescence which can be counteracted by proteasome inhibitors. Palbociclib-induced proteasome activation and senescence is mediated by reduced proteasomal association of ECM29. Loss of ECM29 activates the proteasome, blocks cell proliferation and induces senescence. Finally, we find that ECM29 mRNA levels are predictive of relapse-free survival in breast cancer patients treated with endocrine therapy. In conclusion, thermal proteome profiling identifies the proteasome and ECM29 protein as mediators of palbociclib activity in breast cancer cells.

**Keywords:** cellular thermal shift assay, thermal proteome profiling, palbociclib, CDK4, CDK6, proteasome, ubiquitin, ECM29, breast cancer, senescence

## Introduction

55 The two closely related cyclin-dependent kinases CDK4 and CDK6 together with their binding partners cyclin D1, D2, D3 are key regulators of growth and cell proliferation. The main mechanism by which CDK4/6-cyclin D complexes drive cell cycle progression is through phosphorylation of the retinoblastoma protein (RB1) and related p107 and p130 proteins, which are among the few known CDK4/6 substrates <sup>1</sup>. The  
60 phosphorylation of RB1 drives cell cycle progression from G1 to S phase by allowing E2F transcription factor to induce coordinated transcription of genes required for DNA synthesis and cell cycle progression. Nonetheless, cyclin D and CDK4/6 are not universally required for cell cycle progression in most cell types during development <sup>2</sup>.

Breast cancer is the most common cancer in women with close to two million  
65 cases per year globally. CDK4/6 inhibition has been recognized to have therapeutic potential in estrogen receptor positive (ER+) breast cancers, which constitute up to 75% of all breast cancers. In breast tissue, the CDK4/cyclin D1 axis appears critical for cancer initiation, as demonstrated using animal models and analysis of human breast cancer specimens <sup>3-6</sup>. In addition, CDK4/cyclin D inhibition may be additionally  
70 beneficial for the treatment of human epidermal growth factor receptor 2 (HER2) and RAS driven breast cancers <sup>7, 8</sup> and potentially many other cancers because cyclin D1 displays most frequent somatic copy number aberrations of all cancer genes <sup>9</sup>.

Palbociclib (PD-0332991/Ibrance) is a potent and selective CDK4/6 inhibitor, based on analysis of 36 other kinases tested <sup>10, 11</sup>. In cell models, palbociclib displays  
75 preferential activity in ER<sup>+</sup> as well as human epidermal growth factor receptor 2 (HER2) amplified cell lines <sup>12</sup>. In a recent phase 3 trial, the combinatory treatment with palbociclib and fulvestrant, a selective estrogen receptor downregulator, more than

doubled the median progression-free survival as compared with fulvestrant alone <sup>13, 14</sup>.

While broader specificity CDK inhibitors have performed poorly in clinical trials, it is

not entirely clear why a selective CDK4/6 inhibitor displays such a remarkable

therapeutic response <sup>15</sup>. In addition to the blockade of cancer cell proliferation,

palbociclib also induces senescence <sup>1</sup> and displays other unexpected responses such as

reduction of tumor volume without inducing apoptosis <sup>3</sup>. Many RB1-deficient breast

cancer cells display reduced DNA replication in response to palbociclib <sup>16</sup> and reduced

levels of phosphorylated RB1 alone do not explain the oncosuppressive effects of

palbociclib, at least in liposarcoma patients where such data are available <sup>17</sup>. Similarly,

the palbociclib mediated growth inhibition cannot be fully recapitulated by knockdown

of CDK4/6 in breast cancer cells <sup>18</sup>. Thus, while the RB1 pathway is clearly important

for CDK4/6 mediated cell cycle progression, the therapeutic response to palbociclib

potentially includes additional CDK4/6 or RB1 independent activities. Consistently,

some of the cellular responses to palbociclib, such as senescence, have been reversed

or augmented by knockdowns of seemingly unrelated proteins <sup>19,20</sup>, suggesting that the

mode of action of palbociclib is more complex than previously appreciated. Palbociclib

is therefore likely to have unanticipated, clinically relevant targets beyond cell cycle

inhibition. Furthermore, clinical trials with palbociclib have evaluated the role of

possible biomarkers, but for example gain of cyclin D1, loss of p16, PI-3 kinase

mutations or hormone-receptor expression level are not predictive of the treatment

response <sup>13,21</sup>. Thus, there is an urgent need to identify biomarkers that could predict

the patient population who would benefit most from palbociclib.

Cellular thermal shift assay (CeTSA) has recently emerged as a novel method

to identify drug engagement with target proteins in live cells <sup>22-26</sup>. This method is based

on observing the changes in the thermal stability of a protein, which may be due to

direct drug binding, drug-induced conformational changes, binding to other cellular components or post-translational modifications such as phosphorylation. When  
105 combined with mass spectrometry, the thermal stability changes in proteins can be quantified using a quantitative proteomic approach, holding great promise for identifying drug targets in live cells <sup>26, 27</sup>.

Here we apply mass spectrometry-based cellular thermal shift assay (MS-CeTSA) also known as Thermal Proteome Profiling to study the effects of palbociclib  
110 in MCF7 breast cancer cells, and identify proteasome as a downstream target of palbociclib. Palbociclib reduces the association of proteasomal accessory protein ECM29 with the proteasome resulting in enhanced proteolysis. Consistent with the notion that proteasome activation is part of the mode of action for palbociclib, inhibition of proteasome suppresses the cell cycle and senescence phenotypes induced by  
115 palbociclib. Together, these results show that thermal proteome profiling can be used to discover novel and unexpected drug responses with potential implications to clinical research.

## 120     **Results**

### **Thermal proteome profiling in MCF7 cells**

We performed thermal proteome profiling in MCF7 cells, an ER<sup>+</sup> and HER2<sup>-</sup> cell line with sensitivity to palbociclib<sup>12</sup>. Palbociclib was used at 10 μM concentration in order  
 125     to ensure a complete saturation of ligand binding, which maximizes the shift in detected protein denaturation temperature ( $\Delta T_m$ )<sup>22-26</sup>. While a 10 μM concentration of palbociclib is higher than the typical IC<sub>50</sub> for long term growth inhibition in cell culture, such concentrations are present in tumors in preclinical mouse models<sup>28</sup>. MCF7 cells were treated with palbociclib or vehicle (H<sub>2</sub>O) in triplicates for 1h and incubated at  
 130     temperatures ranging from 37°C to 65°C (**Fig. 1a**). Heat aggregated proteins were removed by centrifugation and soluble proteins were analyzed by multiplexed quantitative mass spectrometry using isotopically labelled tandem mass tags.

Typical data normalization approaches are not easily applicable for thermal proteome profiling data because the total amount of soluble protein declines with  
 135     temperature. We previously described that the accuracy of Western blot based cellular thermal shift assay is improved by normalization to thermally stable proteins, such as superoxide dismutase 1 (SOD1)<sup>22</sup>. When equal amount of protein is analyzed by mass spectrometry for each temperature point, thermally stable proteins display increased abundance with temperature in the raw data (**Fig. 1a, middle**). We used a set of 32  
 140     identified, abundant and thermally stable proteins for normalization of the mass spectrometry data (**Supplementary Table 1**). This single-step normalization improved the data quality substantially, reducing the median standard error of the denaturation temperature for the measured proteome from 1.1°C to 0.6°C (**Supplementary Fig. 1a**).

Our analysis quantified 5515 proteins with high confidence. For 3707 of these,  
 145 we could obtain high quality thermal denaturation curves (**Supplementary Table 2**).  
 The remaining proteins with poorer quality thermal denaturation curves were enriched  
 for membrane proteins and mitochondrial proteins as shown before <sup>26</sup> or displayed  
 atypical thermal denaturation profiles (see **Supplementary Fig. 1b** for examples). A  
 global denaturation profile of the MCF7 proteome indicated a denaturation catastrophe  
 150 at 49°C (**Fig. 1a, right**), consistent with the cellular "thermal death point" of mesophiles  
<sup>29</sup> and the thermal stability of the erythroleukemia K562 proteome <sup>26</sup> (**Supplementary  
 Fig. 2**).

We next analyzed how palbociclib affects thermal stability of proteins, first  
 focusing on protein kinases. Palbociclib increased thermal stability ( $\Delta T_m$  describes the  
 155 difference between the palbociclib treatment and control melting temperatures) of its  
 main targets CDK4 and CDK6, as expected (**Fig. 1b, c**). While the magnitude of the  
 $\Delta T_m$  does not directly indicate binding affinity <sup>23</sup>, CDK4 displayed the second strongest  
 $\Delta T_m$  of all kinases, exceeded only by phosphofructokinase (PFKL, liver isoform), a  
 recently identified CDK6 substrate <sup>30</sup> (**Fig. 1d**).  $\Delta T_m$  of CDK6 was the 8<sup>th</sup> strongest.  
 160 The mechanistic target of rapamycin (MTOR) was also among the kinases with high  
 $\Delta T_m$  value. We also observed thermal destabilization, a decrease in  $\Delta T_m$ , which could  
 result from indirect drug effects <sup>27</sup>, ligand binding to partially unfolded state <sup>31</sup> or  
 conformational changes that destabilize the protein structure. The most destabilized  
 kinases by palbociclib included CDK7 and AKT1 (**Fig. 1d, Supplementary Fig. 3a,**  
 165 **b**). Overall, we observed substantial overlap with previously identified palbociclib  
 binding kinases <sup>32</sup> (**Fig. 1e**) and previously measured palbociclib inhibitory activity  
 against 22 kinases *in vitro* (**Supplementary Fig. 3c**), indicating high quality of our  
 dataset. While, our data indicate that palbociclib may affect multiple pathways

including the PI3K/AKT/MTOR signaling pathway (**Supplementary Fig. 3d**), the  
 170 PI3K/AKT/MTOR pathway inhibition is weak and evident only at higher drug  
 concentrations (**Supplementary Fig. 3e, f, g**). These findings are consistent with  
 previous observations that CDK4/6 inhibition can partially attenuate MTORC1 activity  
 8.

## 175 **Palbociclib activates the 26S proteasome**

To gain a global insight into palbociclib-induced cellular changes, we analyzed  
 what protein complexes were affected by palbociclib. To visualize the separation from  
 non-affected complexes, we plotted changes in both  $\Delta T_m$  and  $\Delta S$ , a parameter related to  
 the change in the slope of the melting curve (see methods). This analysis identified  
 180 complexes involved in DNA replication (RAD17-RFC and PCNA-CHL12-RFC2-5  
 complexes), chromatin modification (E2F-6 complex, STAGA and HMGB1-2  
 complex) (**Fig. 2a**). In addition, we identified the MTORC2 complex and the 20S  
 proteasome. As proteasomal activity is essential for the ordered progression through  
 the cell cycle <sup>33</sup>, and as the proteasome is regulated by MTOR signaling <sup>34</sup> and is a  
 185 potent drug target in human cancers <sup>35</sup>, we decided to study the proteasome in more  
 detail. The complete 26S proteasome is comprised of the core catalytic 20S proteasome  
 and the regulatory 19S lid. Unexpectedly, all components in the 20S proteasome  
 displayed an increase in  $\Delta T_m$  upon palbociclib treatment, whereas the 19S subunits were  
 largely unaffected (**Fig. 2b**).

190 To understand the physiological impact that palbociclib has on the proteasome,  
 we first measured proteasomal activity in MCF7 cells using a fluorescent peptide  
 substrate Me4BodipyFL-Ahx<sub>3</sub>Leu<sub>3</sub>VS <sup>36</sup>. After 1h treatment, palbociclib activated the  
 degradation of the peptide substrate in a dose dependent manner (**Fig. 2c**), whereas



MG-132, a proteasomal inhibitor abolished substrate degradation. Another CDK4/6  
 195 inhibitor, ribociclib, also increased proteasomal substrate degradation, although to a  
 lesser extent. The proteasomal activation persisted when cells were incubated with  
 palbociclib for 30h and the level of proteasomal activation with 1  $\mu$ M palbociclib was  
 comparable to that observed with a known proteasomal activator, the MTOR inhibitor  
 Torin-1 at 0.1  $\mu$ M concentration (**Fig. 2d**). Note that 1  $\mu$ M concentration of palbociclib  
 200 is lower than the typical range (1.4  $\mu$ M – 4.8  $\mu$ M) seen in tumor xenografts after treating  
 mice with 10 mg/kg palbociclib <sup>28</sup>. Palbociclib also activated the proteasome in T47D  
 and HeLa cells (**Supplementary Figs. 4a and 4b**) indicating that this is not a cell type  
 specific effect of the drug.

Activity changes observed with peptide substrates do not necessarily reflect  
 205 changes in proteasomal activity towards protein substrates. We thus examined  
 palbociclib effects on proteasomal activation using the ubiquitin<sup>G76V</sup>-GFP biosensor <sup>37</sup>.  
 30h Palbociclib treatment of HeLa cells expressing Ub<sup>G76V</sup>-GFP resulted in a major  
 reduction in GFP signal, starting with submicromolar doses, consistent with  
 proteasomal activation (**Fig. 2e**). To verify that palbociclib-induced GFP degradation  
 210 was specific for protein degradation, and not due to changes in protein synthesis, we  
 treated Ub<sup>G76V</sup>-GFP expressing cells simultaneously with palbociclib and protein  
 synthesis inhibitor cycloheximide (CHX) or proteasome inhibitor MG-132. Palbociclib  
 increased protein degradation even in the presence of CHX, but not in the presence of  
 MG-132 (**Fig. 2f**). Increased protein degradation in the presence of CHX was also seen  
 215 with ribociclib, a structurally similar CDK4/6 inhibitor (**Fig. 2f**).

We also examined if these results could be explained by increased autophagy,  
 as palbociclib was recently shown to activate autophagy in specific cancer cell lines <sup>18</sup>.  
 However, Western blot analysis of SQSTM1/p62 and LC3A/B protein levels in MCF7

cells did not reveal any significant increase of autophagy to be caused by palbociclib  
 220 (Supplementary Fig. 4c, d). Finally, we induced protein aggregation in cells using the  
 proteasome inhibitor MG-132 and observed that palbociclib can enhance the clearance  
 of aggregated proteins in a proteasome dependent manner when MG-132 is washed out  
 (Supplementary Fig. 4e).

## 225 Palbociclib induces polyubiquitin chains degradation without activating the whole ubiquitin-proteasome pathway

To validate that palbociclib affects proteasomal degradation globally, we  
 examined the total levels of ubiquitinated cellular proteins by Western blot. This  
 revealed that 1  $\mu$ M palbociclib treatment reduced the overall level of ubiquitin  
 230 conjugated proteins in MCF7 cells (Figs. 2g and 2h) without changing the 20S  
 proteasome levels (Fig. 2g). To confirm that the observed reduction in ubiquitin  
 conjugates is related to polyubiquitin chains that are targeted to proteasomal  
 degradation<sup>38</sup>, we treated MCF7 cells with 1  $\mu$ M palbociclib for 10 h in the presence  
 or absence of the proteasome inhibitor bortezomib. We then enriched total  
 235 polyubiquitin and analyzed the linkages by targeted parallel reaction monitoring (PRM)  
 mass spectrometry<sup>39</sup>. This analysis confirmed that amounts of K48 chains, as well as  
 the K6, K29 and K63 chains, were significantly reduced upon palbociclib treatment and  
 this reduction was dependent on proteasomal activity (Fig. 3). Note that the  
 BRCA1/BARD1 ubiquitin E3 ligase<sup>38</sup> generates K6 chains and thus palbociclib  
 240 dependent reduction of K6 chains could be relevant for BRCA1 mutant breast cancers.

If palbociclib activates the whole ubiquitin-proteasome pathway, palbociclib  
 treatment should increase the levels of ubiquitin chains when ubiquitin breakdown is  
 blocked by proteasome inhibition. However, this was not the case, as none of the

ubiquitin chain types displayed increased levels when cells were co-treated with  
 245 palbociclib and bortezomib (**Fig. 3**). When the experiments were done with the  
 proteasome inhibitor MG-132, similar conclusions were reached (**Supplementary Fig.**  
**5**). However, it is worth noticing that bortezomib and MG-132 did not induce fully  
 identical ubiquitin levels, most likely due to the lower specificity of MG-132.  
 Altogether, these data show that palbociclib does not cause increases in protein  
 250 ubiquitination and thus the palbociclib-induced protein degradation is due to a specific  
 activation of the proteasome.

### **Palbociclib activates the proteasome through an indirect, ECM29 mediated mechanism**

255 We next asked if the proteasomal activation is a result of direct interaction  
 between palbociclib and the proteasome or if it is mediated by other cellular proteins.  
*In vitro* proteasome activity assays indicated that the increased proteasome activity was  
 not due to direct palbociclib effect on 20S proteasome (**Fig. 4a**). Next, we examined  
 the primary targets of palbociclib and ribociclib, CDK4 and CDK6. Knockdown of  
 260 CDK4 induced a negligible increase in proteasome activity in HeLa and MCF7 cells  
 (**Fig. 4b**). Knockdown of CDK6 had no effect and combined CDK4 and CDK6  
 knockdown was similar to CDK4 alone (**Fig. 4b**). Proteasome activation was also  
 independent of RB1, the best-established phosphorylation target of CDK4 and CDK6  
 (**Fig. 4c**). We also examined if proteasomal activation by palbociclib occurs at a certain  
 265 phase of the cell cycle by co-staining MCF7 cells with the fluorescent peptide substrate  
 and a DNA binding dye. Palbociclib increased proteasome activity similarly in G1, S  
 and G2/M phases indicating cell cycle independent activation (**Supplementary Fig.**

**4f).** Altogether, these data suggest that palbociclib affects proteasome in a CDK4, CDK6 and cell cycle independent manner.

Palbociclib and ribociclib have overlapping off-target profiles <sup>32</sup> making it possible that a previously unappreciated target(s) mediates the proteasomal activation. Furthermore, as MTOR is a known regulator of proteasome <sup>34</sup>, the weak inhibition of PI3K/AKT/MTOR signaling could be involved in the proteasome activation. To gain insight in to the mechanism of how palbociclib activates the proteasome, we immunoprecipitated proteasomes with anti- $\alpha 4$  20S subunit antibody after 4h treatments with palbociclib or the MTOR inhibitor Torin-1 and used quantitative mass spectrometry to compare changes in proteasomal protein levels and in phosphorylation sites in proteasomal proteins to untreated controls (**Fig. 4d** and **Supplementary Fig. 6a**). The identified phosphosites were largely non-overlapping between palbociclib and Torin-1, suggesting independent mechanisms for proteasome activation (**Supplementary Fig. 6b** and **Supplementary table 5**). Approximately half of the phosphosites in the pulldown from palbociclib treated cells were proline-directed and thus potential substrates for MAPK and CDKs <sup>40</sup>. The remaining sites were highly enriched for acidic residues after the phosphorylated amino acid residue (**Supplementary Fig. 6c**), suggestive of phosphorylation by casein kinase 2, which was identified as a potential palbociclib target (**Fig. 1e**). However, inhibition of casein kinase 2 by quinalizarin (CK2i) (5 $\mu$ M for 2h) did not activate the proteasome, but slightly reduced it (**Supplementary Fig. 6c**, right). Thus, although palbociclib may affect both casein kinase 2 and PI3K/AKT/MTOR signaling (**Fig. 1e** and **Supplementary Fig. 3**), these mechanisms are unlikely to explain the proteasomal activation by palbociclib.

The lack of strong candidate phosphorylation sites in palbociclib treated cells prompted us to analyze if palbociclib could mediate its effects on proteasome through protein levels. Palbociclib-induced changes on the protein levels were much larger than those induced by Torin-1 (**Fig. 4e**), suggesting that palbociclib, unlike Torin-1, may affect proteasome structure and/or assembly. While many 19S subunits displayed reduced levels in the presence of palbociclib, the proteasome activator complex subunit 3 (PSME3) and the proteasomal scaffold protein ECM29 had the largest palbociclib-induced decline in abundance (**Fig. 4e**). ECM29, a 204 kDa protein, has been reported to inhibit proteasomal activity in yeast <sup>41</sup>, possibly by disassembling the proteasome <sup>42</sup>.

We proceeded to examine if palbociclib-induced proteasomal activation could be mediated by ECM29. Consistent with the role of ECM29 as a proteasomal inhibitor <sup>41</sup>, siRNA mediated depletion of ECM29 increased proteasomal activity in both MCF7 and HeLa cells (**Figures 5a, Supplementary Fig. 7a**). Combining ECM29 knockdown with palbociclib treatment did not result in any further increase in proteasomal activity as measured by both the proteasomal activity probe Me4BodipyFL-Ahx<sub>3</sub>Leu<sub>3</sub>VS and Ub<sup>G76V</sup>-GFP degradation (**Fig. 5a, Fig. 5b and Supplementary Fig. 7a**). Thus, ECM29 is required for the palbociclib-induced proteasomal activity, suggesting that ECM29 mediates the palbociclib-induced proteasome effects.

### **ECM29 is critical for normal cell proliferation**

Next, we examined the role of ECM29 in the growth and proliferation of breast cancer cells. We induced loss of ECM29 using CRISPR in MCF7 cells and established a cell line which displayed heterozygous knock-out of ECM29. This cell line displayed extremely slow proliferation (**Fig. 5c**) compared to the parental unaltered cell line. We were not able to create homozygous knockout of ECM29, most likely due to

homozygous knockout being lethal for MCF7 cells. Knockdown of ECM29 using siRNA similarly inhibited MCF7 and T47D cell proliferation (**Supplementary Fig. 7b**), confirming that ECM29 is involved in cell proliferation. The ECM29 knockout cells were also much larger and many of the cells stained positively for acidic  $\beta$ -galactosidase activity, an established marker for cellular senescence (**Fig. 5d**). This suggests that ECM29, or the associated proteasome activity, is involved in regulation of cell senescence, a feature previously associated with palbociclib treatment <sup>1, 18</sup>.

### **ECM29 expression may predict relapse-free survival in breast cancer**

To characterize the potential role of ECM29 as a mediator of palbociclib effects in breast cancer, we examined the potential breast cancer association of ECM29 through the publicly available gene expression data on relapse-free breast cancer patient survival <sup>43</sup>. Lower expression of ECM29 displayed a marginally longer relapse free survival time when all breast cancer cases were analyzed (hazard ratio (HR) = 1.26, logrank  $p = 8.5 \times 10^{-5}$ ,  $n = 3554$ ) (**Fig. 5e**). However, lower expression of ECM29 associated with substantially longer survival times in the patient population with HER2<sup>+</sup> cancers (HR = 2.37,  $p = 0.016$ ,  $n = 168$ ) (**Fig. 5f**). Consistently, CDK4/6 inhibitors have been shown to be effective against HER2<sup>+</sup> cancers in animal models <sup>8</sup>. Furthermore, ECM29 expression levels could predict survival benefit in patients receiving endocrine therapy (HR = 1.59,  $p = 0.00029$ ,  $n = 999$ ) (**Fig. 5g**). Additional gene expression datasets provided further support for the correlation between low expression levels of ECM29 and longer breast cancer patient survival (**Supplementary Fig. 7c**). Altogether, our data suggests that the expression of ECM29 should be investigated as a potential biomarker to better identify those individuals benefiting from palbociclib alone or in combination with endocrine therapy.

## Proteasomal activity is required for palbociclib-induced cellular phenotypes

To gain insight in how increased proteasomal activity could limit breast cancer growth, we examined palbociclib-induced degradation of endogenous proteins in MCF7 cells using Western blotting. A 6h treatment with palbociclib-induced proteasome dependent degradation of 3-Hydroxy-3-Methylglutaryl-CoA Reductase (HMGCR) (**Fig. 6a**), the rate-limiting enzyme of the mevalonate pathway, which is critical for normal cell growth and proliferation <sup>44</sup>. Levels of housekeeping proteins GAPDH and SOD1 were not affected by palbociclib. At a later timepoint (30h), the levels of CDK4 were also reduced by palbociclib in a proteasome-dependent manner (**Fig. 6a, b**), suggesting that in addition to the direct inhibition of CDK4/6 kinase activity, long-term treatment with palbociclib may also inhibit cell proliferation by a positive feedback loop resulting from proteasomal CDK4 degradation.

To understand the role of increased proteasome activity in palbociclib-induced cell cycle arrest, we isolated MCF7 and T47D cells in G1 phase using centrifugal elutriation and treated these cells with palbociclib, bortezomib or both (**Fig. 6c**). Note that we used bortezomib concentrations that do not completely block all proteasomal activity so that cell viability would be maintained (data not shown). Cell cycle analysis showed that palbociclib prevented progression beyond the G1 phase and bortezomib alone induced cell accumulation at G2/M. Unexpectedly, bortezomib, which counteracts the proteasomal activation by palbociclib, could override the palbociclib-induced G1 arrest in both cell lines (**Fig. 6d** and **Fig. 6e**). Thus, these data suggest that proteasomal activity is required for palbociclib-induced cell cycle arrest. Increased proteasomal activation by palbociclib may be an additional mechanism to ensure the completeness of the G1 arrest.

If the proteasomal activation by palbociclib is involved in some of the cellular phenotypes caused by palbociclib treatment, then resistance to palbociclib should also be seen in the form of lower proteasomal activity. Recently, MCF7 and TD47 cell lines resistant to CDK4 and CDK6 inhibitors have been created <sup>19</sup>, and these cells display normal cell cycle profile and proliferation rate in the presence of palbociclib and ribociclib. We examined the proteasomal activity in these cells and observed that the CDK4/6 inhibitor resistant cells displayed much lower baseline proteasome activity than the wild type cells (**Fig. 6f**). Furthermore, when treated with 1  $\mu$ M palbociclib for 6h, the resistant cells displayed much smaller increase in proteasome activity, even after normalization for the baseline difference (**Fig. 6g**). As the resistant cell lines were obtained by selecting for cells capable of proliferation in the presence of ribociclib <sup>19</sup>, these results link the cell cycle responses of palbociclib/ribociclib to the proteasomal activity of the cell.

Palbociclib has been reported to induce a senescence-like state in multiple cell types <sup>1</sup>, and at least in MCF7 cells this senescence-like state is dependent on seemingly unrelated cellular components, like integrin  $\beta$ 3 and TGF beta pathway <sup>20</sup>. We examined the effects of modest proteasome inhibition by bortezomib on the palbociclib-induced senescence-like state in MCF7 cells. Similarly to the partial loss of ECM29 (**Fig. 5d**), Palbociclib (1  $\mu$ M) treatment significantly increased MCF7 cell size and the activity of senescence associated  $\beta$ -galactosidase, while decreasing the levels of Ki-67 (**Figs. 7a, 7b, 7c, 7e, 7f**), all common features of senescence. However, all of these effects were largely or completely suppressed by simultaneous treatment with bortezomib (7.5 nM). We also examined the levels of Ser139 phosphorylated Histone H2A.X ( $\gamma$ H2AX), which is a marker of cellular senescence and DNA damage <sup>45</sup>.  $\gamma$ H2AX was upregulated by palbociclib treatment and this effect was dependent on proteasomal activity (**Fig.**



7a, 7d). While this is consistent with the other senescence markers, it also suggests that palbociclib may have a role in DNA damage accumulation and/or repair, especially as our MS-CeTSA results identified RAD17-RFC and PCNA-CHL12-RFC2-5, which are protein complexes responding to DNA damage as a potential palbociclib targets. Altogether, these results indicate that the proteasomal activation by palbociclib is critical for the induction of a senescence-like state, suggesting that the proteasome activation by palbociclib is part of the drug's mode of action.

## Discussion

Proteasomal activity must be tightly regulated to maintain cellular homeostasis. Proteasomal degradation of cyclins and many other cell cycle regulatory proteins is carefully controlled in order to maintain normal cell cycle progression<sup>33</sup>. Consequently, both activators of proteasome (rapamycin analogs) and direct proteasomal inhibitors (bortezomib) have been considered as treatment options in breast cancer. Using the thermal proteome profiling approach, we identify the proteasome as a novel downstream target for the CDK4/6 inhibitor palbociclib. Further functional analyses revealed that palbociclib causes proteasomal activation at least partly by detaching the proteasomal association of EMC29, which normally suppresses proteasome activity. Similar, albeit less potent, proteasome activation was also observed with ribociclib, a structurally related CDK4/6 inhibitor. Further studies are required to identify the direct targets of palbociclib that mediate the proteasomal disassociation of EMC29, and our thermal proteome profiling datasets are likely to be useful in this. Curiously, the proteasomal activation by palbociclib was not associated with increased protein ubiquitination, and the palbociclib treatment led to a decrease of several ubiquitin chain types in cells. Nonetheless, the palbociclib-induced augmented proteolysis, including

degradation of endogenous proliferation related proteins such as HMGR and CDK4.

Consistently, the proteasome activation by palbociclib seems to be involved in the reduction of cancer cell proliferation and, especially, in the induction of a senescence-

420 like state (**Fig. 7g**).

Palbociclib has been a highly effective compound in the treatment of patients with advanced ER<sup>+</sup> and HER2<sup>-</sup> breast cancer<sup>13,21</sup>. Given that breast cancers constitute up to 15% of all cancer cases and more than 70% of breast cancers are ER<sup>+</sup> and HER2<sup>-</sup>, palbociclib potentially targets the largest population of cancer patients. A major need

425 to be addressed is the identification of the most responsive patient subpopulation.

Although further studies are required, analysis of existing mRNA expression data related to breast cancer survival suggests that ECM29 could be a useful biomarker for HER<sup>+</sup> cancers and those patients receiving endocrine therapy. We observed that

430 palbociclib reduces the proteasomal association of ECM29 which causes a major reduction in cell proliferation. Palbociclib could therefore be more beneficial in the population with high ECM29 levels, which predict poorer relapse-free survival in patients receiving endocrine therapy.

In contrast to recent work where proteasomal inhibition by DYRK2 kinase knockout was shown to reduce cell cycle progression<sup>46</sup>, we find that high proteasomal

435 activity associates with G1 arrest induced by CDK4/6 inhibition, which may lead to senescence. Our finding is consistent with earlier observations in other model systems

where inhibition of the ubiquitin-proteasome system may override CDK4/6 mediated G1 arrest<sup>47,48</sup>. Overall, the current and previous work indicate that the role of the

proteasome in cell cycle progression is complex, likely context dependent and,

440 importantly, exploited by cancer cells to promote cell proliferation. Instead of a simplistic view where more proteasomal activity is always better for the cell, it seems

that appropriate proteasomal homeostasis is required for the maintenance of cell proliferation. Proteolytic homeostasis that supports proliferation and cancer growth may also be dependent on autophagy, inhibition of which was recently reported to  
445 synergize with palbociclib <sup>18</sup>. Preclinical data suggests that palbociclib sensitizes myeloma cells to bortezomib-induced cell death <sup>49</sup>, but our work raises the question of whether proteasome inhibition and palbociclib are a good combination for breast cancer therapy due to their partly antagonist activity. Indeed, proteasomal activators may have therapeutic potential in certain cancers and this is worthy of further preclinical and  
450 translational investigation.

## Methods

### 455 Cell culture, elutriations and transfections

MCF7 and T47D cells were cultured in RPMI and HeLa-TREx cells were cultured in high glucose DMEM. Media were supplemented with 10% FBS (Sigma-Aldrich), 1% L-glutamine and 1% Penicillin and Streptomycin and for T47D additionally with 10 µg/ml human insulin (Sigma-Aldrich). Cells were checked for mycoplasma infections. All experiments were performed in non-confluent cells. For CRISPR/Cas9 knockout, ECM29 was targeted using a dual cleavage strategy with paired guide sequences CCTGAGACTCGACTTGCTATTCA and GGTGAGCGTATAGTACTTTGG cloned into the Cas9 D10A vector pX335 and pBABED puro U6. For cell counting and fluorescence measurements Accuri C6  
460 cytometer (Becton-Dickinson) was used so that only cells of viable size were included in the analysis as estimated using FSC-A and SSC-A values. All fluorescence values were normalized to cell size (FSC-A), as prolonged incubations with, for example, palbociclib increased the cell size.

siRNAs were obtained from Integrated DNA Technologies. Two independent  
470 siRNAs (20 nM each) were combined to target each gene and the siRNAs were transfected using Qiagen's HiPerFect transfection reagent. The following siRNAs were used: CDK4 (HSC.RNAI.N000075.12.1 and HSC.RNAI.N000075.12.2), CDK6 (HSC.RNAI.N001145306.12.1 and HSC.RNAI.N001145306.12.2), RB1 (HSC.RNAI.N000321.12.1 and HSC.RNAI.N000321.12.2) and ECM29  
475 (HSC.RNAI.N001080398.12.1 and HSC.RNAI.N001080398.12.2). Ub<sup>G76V</sup>-GFP was transfected using Promega's FuGENE transfection reagent. For proliferation assay after

ECM29 RNAi in MCF7 and T47D cell culture, cells were cultured in complete medium and absolute cell count was measured every 24h for 4 days.

MCF7 and T47D cells were synchronized to early/mid G1 using centrifugal elutriation, which was carried out as before<sup>44</sup>. Cells were then plated for 3h after which indicated chemicals were added for 15h. Cell cycle distributions were analyzed by propidium iodide staining.

### **Antibodies and Western blotting**

For Western blots, cells were directly lysed in Laemmli buffer. Validations of MS-CeTSA were carried out by loading equal volume of each temperature fraction on a SDS-PAGE gel. SOD1 band intensities were used to verify equal sample loading. The following antibodies were purchased from Cell Signaling Technology: AKT (#4691), p-AKT S473 (#9271), CDK4 (#2906), CDK6 (#3136), CDK7 (#2916), GAPDH (#5174), p70 S6K, p-p70-S6K T389 (#9234), RB (#9309), p-RB S780 (#8180), S6-RP (#2317), p-RPS6 S235/236 (#4858). The S20 Proteasome antibody was from VIVA Bioscience (VB2452), SOD1 antibody was from Sigma-Aldrich (HPA001401), the Ubiquitin antibody was from eBioscience (eBioP4D1) and the HMGCR and ECM29 antibodies were from Abcam (ab98018 and ab28666, respectively). For the Pathscan Intracellular Signalling array (Cell Signaling Technology), T47D cells were incubated with 0, 0.1, 1 and 10  $\mu$ M palbociclib for 1h. Samples were processed as per manufacturer's instructions for fluorescent detection. In all assays antibodies were used at the concentrations recommended by the supplier and detected using infrared-dye conjugated secondary antibodies and a LICOR Odyssey detection system. Protein levels were quantified using ImageJ and both GAPDH or SOD1 levels were used to control equal sample loading in Western blots.

## Thermal profiling sample preparation

Sample preparation was performed similar to the previous protocols <sup>22, 26</sup> with  
 505 the following modifications. MCF7 cells were trypsinized, washed with PBS and  
 suspended in PBS supplemented with a protease inhibitor cocktail (Sigma-Aldrich).  
 Suspended cells ( $2 \times 10^4$  cells/ $\mu$ l) were treated with 10  $\mu$ M Palbociclib or H<sub>2</sub>O for 1 h at  
 37°C with gentle mixing. Each sample was then separated into 10 fractions, each with  
 5x10<sup>6</sup> cells for thermal profiling. Fractions were heated at the indicated temperatures  
 510 (37°C to 65°C) for 3 min using an Eppendorf Thermomixer with mixing (500 rpm).  
 Fractions were then incubated for 3 min at room temperature and frozen on dry ice.  
 Samples were lysed with four freeze-thaw-cycles using dry ice and 35°C water bath.  
 Cell lysates were centrifuged at 16000xg for 15 min at 4°C to separate protein  
 aggregates from soluble proteins. Supernatants were collected and used for mass  
 515 spectrometry and Western blots.

## Proteasome activity assays

Live cell proteasome activity was assessed by pretreating cells with the  
 indicated chemicals followed by 1h incubation in the presence of 0.5  $\mu$ M proteasome  
 520 activity probe (Me4BodipyFL-Ahx<sub>3</sub>Leu<sub>3</sub>VS; BostonBiochem) <sup>36</sup>. After incubation,  
 cells were washed with PBS and analysed by flow cytometry. The specificity of the  
 proteasome activity probe was also validated on a SDS-PAGE gel, where an equal  
 amount of each sample was loaded to assess proteasome staining.

GFP degradation was measured by reverse transfecting HeLa-TREx cells with  
 525 the short-lived Ub<sup>G76V</sup>-GFP <sup>37</sup>, 12h later treating the cells with doxycycline to induce  
 GFP expression and another 12h later adding the indicated chemicals. GFP levels were

measured using flow cytometry and the protein degradation % was calculated by normalising the data to control (0% degraded) and negative control without the GFP construct (100% degraded). When examining GFP levels in the absence of protein synthesis, cells were treated with 100  $\mu$ M cycloheximide at the same time as when chemicals of interest were added.

Proteasome activity towards protein aggregates were also measured using the ProteoStat Aggresome detection reagent (EnzoLifeSciences). MCF7 cells were first treated with control or palbociclib and cultured in the presence of MG-132 for 18h to accumulate protein aggregates. The cells were then washed twice and treated with palbociclib or control. After 4h the protein aggregate levels were measured using flow cytometer according to the supplier's instructions. Data were normalized to that 0% represents the basal level of protein aggregates in a control untreated with MG-132 and that 100% represents the level to which MG-132 increased the protein aggregates.

20S proteasome activity *in vitro* was assayed as previously described<sup>50</sup>. Briefly, MCF7 cells were lysed in assay buffer (25 mM HEPES-KOH pH 7.4, 0.5 mM EDTA, 0.05 % (v/v) NP-40, 0.001 % (w/v) SDS). 40  $\mu$ g clarified lysate was preincubated with the inhibitors for 10 min in assay buffer containing 100  $\mu$ M ATP before the addition of chymotrypsin-like substrate Suc-LLVY-AMC (EnzoLifeSciences), caspase-like substrate Z-Leu-Leu-Glu-AMC (EnzoLifeSciences) or trypsin-like substrate Z-ARR-AMC (Millipore) to 100  $\mu$ M final concentration. Final reaction volume was 100  $\mu$ l.

### Cell senescence assays and proliferative markers detection

MCF7 cells were cultured with either 7.5 nM bortezomib, 1  $\mu$ M palbociclib or both for ten days, with media change every second day. Note that higher concentrations of bortezomib became toxic to the cells in long term (data not shown). For  $\beta$ -

galactosidase activity, cells were fixed with 4% paraformaldehyde and stained with 0.1%  $\beta$ -gal, 5 mM potassium ferrocyanide, 5 mM potassium ferricyanide, 150 mM NaCl, and 2 mM  $MgCl_2$  in 40 mM citric acid/sodium phosphate solution, pH 6.0 for overnight at 37°C. The cells were washed with PBS and imaged using Nikon Eclipse TS100 microscope. For Ki67 and phospho-Histone H2A.X (Ser139) assays, cells were fixed with 4% paraformaldehyde, permeabilized with 0.5 % Triton X-100 for 5 min, washed twice with 5 % BSA in PBS, and stained with antibodies o/n in +4°C. Ki-67 (D3B5) Alexa Fluor 488 conjugate antibody and Phospho-Histone H2A.X (Ser139) (20E3) Alexa Fluor 647 conjugate antibody were obtained from CST (#11880 and #9720, respectively). The following day cells were washed twice with 5 % BSA in PBS and antibody staining levels were analyzed using LSR II flow cytometer from BD Biosciences. The antibody staining was validated using microscopy, for which samples were stained as before, with the exception that the DNA was stained with DAPI after antibody staining, which was followed by two washes with PBS. Cells were imaged with DeltaVision widefield deconvolution microscope in VectaShield mounting media (VectorLabs) using a 60X objective.

### **Immunoprecipitation of proteasomes**

MCF7 cells cultured in 10 cm dishes were treated for 4h with 10  $\mu$ M palbociclib or 1  $\mu$ M Torin-1 in triplicates or left untreated. Cells were lysed in 25 mM Hepes, pH 7.4, 10% glycerol, 5 mM  $MgCl_2$ , 1 mM ATP, 1 mM DTT and phosphatase inhibitor cocktail. Clarified lysates were incubated with agarose immobilized 20S  $\alpha$ 4 subunit monoclonal antibody (BML-PW9005-0500, EnzoLifeSciences) for 1 h at +4°C and the beads washed three times with 500  $\mu$ l lysis buffer without inhibitors.



## Protein extraction and digestion

Protein concentration of samples were determined (BCA Protein Assay) and used to normalize the volume corresponding to the protein quantity necessary for tandem mass tag labeling (100 µg). Final concentration of 50 mM tris (2-carboxyethyl) phosphine (TCEP), 50 mM triethylammonium bicarbonate pH 8.0 in 10% 2,2,2-trifluoroethanol (TFE) was added to protein lysates and heated at 55°C for 30 min. Cysteines were then alkylated in 10 mM iodoacetamide (Sigma), excess reagent was quenched with 10 mM dithiothreitol (Sigma) and digested overnight at 37°C by adding porcine trypsin (1:50, w/w) (Pierce). Peptides were desalted via C18 Macro SpinColumns (Harvard Apparatus) and dried under vacuum centrifugation.

## Tandem mass tagging labeling

Isobaric labeling of peptides was performed using the 10-plex tandem mass tag (TMT) reagents (Thermo Scientific). TMT reagents (0.8 mg) were dissolved in 40 µL of acetonitrile and 20 µL was added to the corresponding fractions, previously dissolved in 100 µL of 50 mM triethylammonium bicarbonate, pH 8.0. The reaction was quenched by addition of 8 µL of 5% hydroxylamine after 1h incubation at room temperature. According to the different temperature points, labelled peptides were combined, acidified with 200 µL of 0.1% TFA (pH ~ 2) and concentrated using the C18 SPE on Sep-Pak cartridges (Waters).

## Hydrophilic Strong Anion Exchange (hSAX) chromatography

TMT labeled peptides were subjected to hydrophilic Strong Anion Exchange (hSAX) fractionation<sup>51</sup>. Labeled peptides were solubilized in 20 mM Tris-HCl, pH 10.0) and separated on a Dionex RFIC IonPac AS24 column (IonPac series, 2 × 250

mm, 2000 Å pore size) (Thermo Scientific). Using a DGP-3600BM pump system equipped with a SRD-3600 degasser (Thermo Scientific) a 30 min gradient length from 8% to 80% of 1M NaCl in 20 mM Tris-HCl, pH 10 (flow rate of 0.25 mL/min), separated the peptide mixtures into a total of 34 fractions. The 34 fractions were merged into 15 samples, acidified with 1% trifluoroacetic acid (TFA) (pH ~ 2), desalted via C18 Macro SpinColumns (Harvard Apparatus), dried under vacuum centrifugation and re-suspended in 2% acetonitrile (ACN) / 0.1% TFA for LC-MS/MS analysis.

### **Liquid chromatography mass spectrometry (LC-MS)**

Peptide samples were separated on an Ultimate 3000 Rapid Separation LC Systems chromatography (Thermo Scientific) with a C18 PepMap, serving as a trapping column (2 cm x 100 µm ID, PepMap C18, 5 µm particles, 100 Å pore size) followed by a 50 cm EASY-Spray column (50 cm x 75 µm ID, PepMap C18, 2 µm particles, 100 Å pore size)(Thermo Scientific) with a linear gradient consisting of 2.4-28% (ACN, 0.1% formic acid (FA)) over 150 min at 300 nl/min. Mass spectrometric identification and quantification was performed on an Orbitrap Fusion Tribrid mass spectrometer (Thermo Scientific) operated in data dependent, positive ion mode. FullScan spectra were acquired in a range from 400 m/z to 1500 m/z, at a resolution of 120,000, with an automated gain control (AGC) of 300,000 ions and a maximum injection time of 50 ms. The 12 most intense precursor ions were isolated with a quadrupole mass filter width of 1.6 m/z and CID fragmentation was performed in one-step collision energy of 32% and 0.25 activation Q. Detection of MS/MS fragments was acquired in the linear ion trap in a rapid mode with an AGC target of 10,000 ions and a maximum injection time of 40 ms. Quantitative analysis of TMT-tagged peptides was performed using FTMS3 acquisition in the Orbitrap mass analyser operated at

60,000 resolution, with an AGC target of 100,000 ions and a max injection time of 120 ms. Higher-energy C-trap dissociation (HCD fragmentation) on MS/MS fragments was performed in one-step collision energy of 55% to ensure maximal TMT reporter ion yield and synchronous-precursor-selection (SPS) was enabled to include 10 MS/MS fragment ions in the FTMS3 scan.

### Data processing and quantitative data analysis

Protein identification and quantification were performed using MaxQuant Version 1.5.1.7<sup>52</sup> with the following parameters: stable modification carbamidomethyl (C); variable modifications oxidation (M), acetylation (protein N terminus), deamidation (NQ), hydroxyproline (P), quantitation labels with 10plex TMT on N-terminal or lysine with a reporter mass tolerance of 0.01 Da and trypsin as enzyme with 2 missed cleavages. Search was conducted using the Uniprot-Trembl Human database (42,096 entries, downloaded March 17<sup>th</sup>, 2015), including common contaminants. Mass accuracy was set to 4.5 ppm for precursor ions and 0.5 Da for ion trap MS/MS data. Identifications were filtered at a 1% false-discovery rate (FDR) at the protein level, accepting a minimum peptide length of 5 amino acids. Quantification of identified proteins referred to razor and unique peptides, and required a minimum ratio count of 2. Normalized ratios were extracted for each protein/conditions and were used for downstream analyses. Raw data and the MaxQuant output have been submitted to the PRIDE database (<https://www.ebi.ac.uk/pride/archive/>) and assigned the identifier PXD003704. Protein complexes were identified based on annotations in the Corum database (<http://mips.helmholtz-muenchen.de/genre/proj/corum/>) using the Core Complexes dataset. Only complexes with four or more proteins were included in the analysis. Mean  $\Delta T_m$  and  $\Delta S$  for each complex was used for plotting the average change

of the complex. Outlier complexes were identified by plotting a 95% confidence interval based on normal-probability contour over the two dimensional scatter plot data using the *dataEllipse* function in R.

655

### **Data normalization**

Stable proteins were classified as those with increasing relative abundance at higher temperatures in control samples. Preliminary analyses showed that those proteins with an average of at least 5 times higher abundance at 59°C compared to 37°C and which were identified by at least 5 unique peptides minimised the standard error in denaturation curve fitting. Keratins were omitted from the list of stable proteins as they could be a contamination from sample handling. The 59°C data point rather than any higher temperature point was used as the identification of stable proteins as it had the minimum standard error of the curve fitting. Mean abundance for the identified 32 stable proteins were calculated for each temperature and the relative abundancies of the proteins at each temperature were divided with the mean abundance for the 32 proteins at the same temperature. For immunoprecipitated proteasomes, protein abundance data was normalized to the total abundance of 20S subunits, excluding the less abundant immunoproteasome subunits.

670

### **Denaturation curve fitting**

For the 5515 proteins quantified by mass spectrometry, only those identified with 2-3 replicates in both control and palbociclib treated cells were included for the final analysis. The sigmoid curve from Savitsky et al. (2014),

675

$$f(T) = \frac{1 - f_0}{1 + e^{-(a/T-b)}} + f_0,$$

where  $f_0$  is the plateau at temperature  $T \rightarrow \infty$ , while  $a$  and  $b$  control the shape of the function. The melting temperature is defined as  $f(T_m) = \frac{1}{2}$ , and expressed by

$$T_m = \frac{a}{\ln(1 - 2f_0) + b}.$$

The slope of the sigmoid,  $S = f'(T_i)$ , is calculated at the inflection point,  $T_i$ , where

680  $f''(T_i) = 0.$

The sigmoid function can be reparameterized to fit for the melting temperature directly, by replacing  $b$  with  $T_m$ ,

$$f(T) = \frac{1 - f_0}{1 + (1 - 2f_0)^{-1} e^{a\left(\frac{1}{T_m} - \frac{1}{T}\right)}} + f_0.$$

This form of the sigmoid curve was fit to all protein profiles using the non-linear least  
685 squares method (package ‘nls’ in R). Each protein was fit ten times with randomized initial parameters to minimize the chance of finding a false local  $\chi^2$  minimum.

To exclude poorly fitting data, Z scores were calculated for the residual mean variation from the curve fitting and included only if  $|Z \text{ score}| < 3$ . Finally, we included only proteins where the standard error of  $\Delta T_m$  was less than median  $+ 3 \times$  median average  
690 deviation (MAD) for the standard error of  $\Delta T_m$ . The final list consisted of 3707 proteins.

### Mass spectrometry analysis of immunoprecipitated proteasome.

Protein extracts from each biological replicates were loaded on NuPAGE 4-12% bis-tris acrylamide gels (Invitrogen). Running of protein was stopped as soon as  
695 proteins stacked in a single band, stained with InstantBlue (Expedeon), cut from the gel and digested with trypsin protease, MS Grade (Pierce) as described previously<sup>53</sup>. Mass spectrometry analysis was carried out by LC-MS/MS using similar settings as described above except that samples were measured in “Top Speed” data-dependent

acquisition mode. Statistical significance was analysed from the three replicate samples

700 by two-tailed t-test without adjusting for multiple hypothesis testing.

### **Pull-down of ubiquitylated proteins**

MCF7 cells were cultured in three replicates with and without 1  $\mu$ M palbociclib for 24 h. Cells were lysed in 50 mM Tris-HCl pH 7.5, 150 mM NaCl, 1% Triton, 0.1mM  
705 EDTA, 0.1 mM EGTA, 100 mM N-ethylmaleimide and Complete protease inhibitor cocktail (Roche). Lysates were sonicated and centrifuged to remove insoluble materials. Protein concentration was determined by BCA protein assay (Pierce) and 10 mg of protein was pre-incubated with 50  $\mu$ L of HaloLink resin (Promega) for 30 min at 4°C. Supernatants were then incubated with 50  $\mu$ L of Halolink-UBA resin (UBA  
710 domain of Ubiquilin-1, amino acids Q539-Q587) for 3 h at 4°C.

The poly-ubiquitin (polyUb) chains captured by the UBA domain of Ubiquilin<sup>54</sup>, were washed three times with lysis buffer and Halo-tagged UBA containing polyUb proteins were solubilised by adding reducing Laemmli sample buffer (Invitrogen). Extracts were loaded on NuPAGE 4-12% bis-tris acrylamide. Running of protein was  
715 stopped as soon as proteins stacked in a single band, stained with InstantBlue (Expedeon), cut from the gel, reduced with 10 mM TCEP for 10 min at 65°C and digested with trypsin before analysis by mass spectrometry.

### **Preparation of Ub-AQUA peptide mixtures**

720 Concentrated stocks of isotopically labelled internal standard (heavy) peptides and light synthetic peptides (M1, K6, K11, K27, K29, K33, K48, K63) were purchased from Cell Signaling Technologies). All stock solutions were stored at -80°C, working stock solution of individual peptides were prepared at 25 pmol/ $\mu$ l in 2% ACN, 0,1%

FA and used to prepare an experimental mixture consisting of 8 peptides at 1 pmol/ $\mu$ L in 2% ACN, 0.1% FA. The mixtures were frozen at -80°C in triplicate use aliquots for direct addition to samples.

### Targeted mass spectrometry of ubiquitin chain types

Absolute analysis of ubiquitin chain types was performed similar to reported previously<sup>55</sup>. Quantitation using parallel reaction monitoring (PRM) was performed on an Orbitrap Fusion mass spectrometer (Thermo- Fisher Scientific) with an Easy-Spray source coupled to an Ultimate 3000 Rapid Separation LC system (Thermo Fischer Scientific). Samples were loaded via a 5  $\mu$ L full loop injection directly onto an EASY-Spray column (15 cm x 75  $\mu$ m ID, PepMap C18, 3  $\mu$ m particles, 100 Å pore size, Thermo-Fisher Scientific) and separated by reverse phase chromatography at a flow rate of 1  $\mu$ L/min where solvent A was 98% H<sub>2</sub>O, 2% ACN, 0.1% FA and solvent B was 98% ACN, 2% H<sub>2</sub>O, 0.1% FA. Upon LC direct injection, peptides were resolved with an isocratic gradient of 0.1% of solvent B over 10 min, followed by a step from 0.1% to 25.5% of solvent B over 41 min, 5 min of high organic wash (90% solvent B) and 12 min re-equilibration at 0.1% of solvent B. The Orbitrap Fusion mass spectrometer was operated in targeted mode “tMS2” for the detection of light and synthetic heavy peptides. The included m/z values were selected by the quadrupole, with 4 m/z isolation window, a maximum injection time of 100 ms and a maximum AGC target of 50000. HCD fragmentation was performed at 30% collision energy for all included peptides and MS/MS fragments were detected in the Orbitrap mass analyzer at a FMWH resolution of 30,000 (at m/z 200). Peak integration of MS/MS spectra and quantification of Ub peptides were performed on Skyline (version 3.5.0.9191) (<http://proteome.gs.washington.edu/software/skyline>)<sup>56</sup>.

## 750 **Kinase inhibitor data**

The *in vitro* activity data for palbociclib were downloaded from <http://www.kinase-screen.mrc.ac.uk/kinase-inhibitors>.

## **Kaplan-Meier survival analysis**

755 Kaplan–Meier curves for ECM29 in breast cancer were generated using the KMplot online service (<http://www.kmplot.com>), which combines publicly available mRNA expression datasets and associated clinical information<sup>43</sup>. The survival was assessed for the whole population and various subpopulations of which HER2 expressing and endocrine therapy receiving patient populations displayed most  
760 significant survival benefits.



## Author Contributions

Conceptualization: M.B. and M.T. together with T.P.M and J.P.; Methodology:

765 T.P.M., J.P., A.H., M.G., V.M.J., M.B. and M.T.; Investigation: T.P.M., J.P., A.H.  
and M.B.; Writing – Original Draft: M.B.; Writing – Review & Editing: T.P.M., J.P.,  
A.H., V.M.J., M.B. and M.T.; Supervision: M.B. and M.T.

## Acknowledgements

770 We would like to thank Philipp Kaldis for comments; DNA cloning, Protein  
Production, Antibody Production, DNA sequencing facility and mass spectrometry  
teams of the MRC Protein Phosphorylation and Ubiquitylation Unit for their support;  
Victoria Cowling, Gopal Sapkota, Tom Macartney and Dario Alessi for providing  
reagents and Orsolya Bilkei-Gorzo for preparing the UBA binding domain of  
775 ubiquitin1. This work was funded by Medical Research Council UK (MC\_UU\_12016/5  
to M.T.), the BBSRC (BB/L008874/1) and the pharmaceutical companies supporting  
the Division of Signal Transduction Therapy (DSTT) (AstraZeneca, Boehringer-  
Ingelheim, GlaxoSmithKline, Janssen Pharmaceuticals, Merck KGaA and Pfizer). M.T.  
thanks Thermo-Fisher Scientific for support with the TMT Research Award. The  
780 School of Life Sciences Data Analysis Group is funded by the Wellcome Trust grant  
097945/Z/11/Z. T.P.M. is supported by the Wellcome Trust Sir Henry Postdoctoral  
Fellowship (grant number 110275/Z/15/Z). V.M.J is supported by the Conquer Cancer  
Foundation of ASCO Young Investigator Award (8364), Komen Post-Doctoral Award  
(15329319) and the Vanderbilt Clinical Oncology Research Career Development  
785 Program (2K12CA090625-17).

## References

1. Anders, L. *et al.* A systematic screen for CDK4/6 substrates links FOXM1 phosphorylation to senescence suppression in cancer cells. *Cancer Cell* **20**, 620-634 (2011). 790
2. Kozar, K. & Sicinski, P. Cell cycle progression without cyclin D-CDK4 and cyclin D-CDK6 complexes. *Cell Cycle* **4**, 388-391 (2005).
3. Choi, Y.J. *et al.* The requirement for cyclin D function in tumor maintenance. *Cancer Cell* **22**, 438-451 (2012).
- 795 4. Yu, Q. *et al.* Requirement for CDK4 kinase function in breast cancer. *Cancer Cell* **9**, 23-32 (2006).
5. Landis, M.W., Pawlyk, B.S., Li, T., Sicinski, P. & Hinds, P.W. Cyclin D1-dependent kinase activity in murine development and mammary tumorigenesis. *Cancer Cell* **9**, 13-22 (2006).
- 800 6. Bartkova, J. *et al.* Cyclin D1 protein expression and function in human breast cancer. *Int J Cancer* **57**, 353-361 (1994).
7. Yu, Q., Geng, Y. & Sicinski, P. Specific protection against breast cancers by cyclin D1 ablation. *Nature* **411**, 1017-1021 (2001).
8. Goel, S. *et al.* Overcoming Therapeutic Resistance in HER2-Positive Breast Cancers with CDK4/6 Inhibitors. *Cancer Cell* **29**, 255-269 (2016).
- 805 9. Leiserson, M.D. *et al.* Pan-cancer network analysis identifies combinations of rare somatic mutations across pathways and protein complexes. *Nat Genet* **47**, 106-114 (2015).
10. Fry, D.W. *et al.* Specific inhibition of cyclin-dependent kinase 4/6 by PD 0332991 and associated antitumor activity in human tumor xenografts. 810 *Mol Cancer Ther* **3**, 1427-1438 (2004).
11. Toogood, P.L. *et al.* Discovery of a potent and selective inhibitor of cyclin-dependent kinase 4/6. *J Med Chem* **48**, 2388-2406 (2005).
12. Finn, R.S. *et al.* PD 0332991, a selective cyclin D kinase 4/6 inhibitor, preferentially inhibits proliferation of luminal estrogen receptor-positive human breast cancer cell lines in vitro. *Breast Cancer Res* **11**, R77 (2009).
- 815 13. Cristofanilli, M. *et al.* Fulvestrant plus palbociclib versus fulvestrant plus placebo for treatment of hormone-receptor-positive, HER2-negative metastatic breast cancer that progressed on previous endocrine therapy (PALOMA-3): final analysis of the multicentre, double-blind, phase 3 randomised controlled trial. *Lancet Oncol* **17**, 425-439 (2016).
- 820 14. Turner, N.C. *et al.* Palbociclib in Hormone-Receptor-Positive Advanced Breast Cancer. *N Engl J Med* **373**, 209-219 (2015).
15. Sherr, C.J., Beach, D. & Shapiro, G.I. Targeting CDK4 and CDK6: From Discovery to Therapy. *Cancer Discov* (2015).
- 825 16. Dean, J.L., Thangavel, C., McClendon, A.K., Reed, C.A. & Knudsen, E.S. Therapeutic CDK4/6 inhibition in breast cancer: key mechanisms of response and failure. *Oncogene* **29**, 4018-4032 (2010).
17. Kovatcheva, M. *et al.* MDM2 turnover and expression of ATRX determine the choice between quiescence and senescence in response to CDK4 inhibition. *Oncotarget* **6**, 8226-8243 (2015).
- 830 18. Vijayaraghavan, S. *et al.* CDK4/6 and autophagy inhibitors synergistically induce senescence in Rb positive cytoplasmic cyclin E negative cancers. *Nat Commun* **8**, 15916 (2017).

- 835 19. Jansen, V.M. *et al.* Kinome-Wide RNA Interference Screen Reveals a Role for PDK1 in Acquired Resistance to CDK4/6 Inhibition in ER-Positive Breast Cancer. *Cancer Res* **77**, 2488-2499 (2017).
20. Rapisarda, V. *et al.* Integrin Beta 3 Regulates Cellular Senescence by Activating the TGF-beta Pathway. *Cell Rep* **18**, 2480-2493 (2017).
- 840 21. Finn, R.S. *et al.* The cyclin-dependent kinase 4/6 inhibitor palbociclib in combination with letrozole versus letrozole alone as first-line treatment of oestrogen receptor-positive, HER2-negative, advanced breast cancer (PALOMA-1/TRIO-18): a randomised phase 2 study. *Lancet Oncol* **16**, 25-35 (2015).
- 845 22. Miettinen, T.P. & Bjorklund, M. NQO2 is a reactive oxygen species generating off-target for acetaminophen. *Mol Pharm* **11**, 4395-4404 (2014).
23. Martinez Molina, D. *et al.* Monitoring drug target engagement in cells and tissues using the cellular thermal shift assay. *Science* **341**, 84-87 (2013).
- 850 24. Huber, K.V. *et al.* Proteome-wide drug and metabolite interaction mapping by thermal-stability profiling. *Nat Methods* (2015).
25. Reinhard, F.B. *et al.* Thermal proteome profiling monitors ligand interactions with cellular membrane proteins. *Nat Methods* (2015).
26. Savitski, M.M. *et al.* Tracking cancer drugs in living cells by thermal profiling of the proteome. *Science* **346**, 1255784 (2014).
- 855 27. Franken, H. *et al.* Thermal proteome profiling for unbiased identification of direct and indirect drug targets using multiplexed quantitative mass spectrometry. *Nat Protoc* **10**, 1567-1593 (2015).
- 860 28. Nguyen, L. *et al.* Quantitative analysis of PD 0332991 in xenograft mouse tumor tissue by a 96-well supported liquid extraction format and liquid chromatography/mass spectrometry. *J Pharm Biomed Anal* **53**, 228-234 (2010).
29. Ghosh, K. & Dill, K. Cellular proteomes have broad distributions of protein stability. *Biophys J* **99**, 3996-4002 (2010).
- 865 30. Wang, H. *et al.* The metabolic function of cyclin D3-CDK6 kinase in cancer cell survival. *Nature* **546**, 426-430 (2017).
31. Cimmperman, P. *et al.* A quantitative model of thermal stabilization and destabilization of proteins by ligands. *Biophys J* **95**, 3222-3231 (2008).
32. Sumi, N.J., Kuenzi, B.M., Knezevic, C.E., Remsing Rix, L.L. & Rix, U. Chemoproteomics Reveals Novel Protein and Lipid Kinase Targets of Clinical CDK4/6 Inhibitors in Lung Cancer. *ACS Chem Biol* (2015).
- 870 33. Koepp, D.M., Harper, J.W. & Elledge, S.J. How the cyclin became a cyclin: regulated proteolysis in the cell cycle. *Cell* **97**, 431-434 (1999).
34. Zhao, J., Zhai, B., Gygi, S.P. & Goldberg, A.L. mTOR inhibition activates overall protein degradation by the ubiquitin proteasome system as well as by autophagy. *Proc Natl Acad Sci U S A* **112**, 15790-15797 (2015).
- 875 35. Goldberg, A.L. Development of proteasome inhibitors as research tools and cancer drugs. *J Cell Biol* **199**, 583-588 (2012).
36. Berkers, C.R. *et al.* Profiling proteasome activity in tissue with fluorescent probes. *Mol Pharm* **4**, 739-748 (2007).
- 880 37. Dantuma, N.P., Lindsten, K., Glas, R., Jellne, M. & Masucci, M.G. Short-lived green fluorescent proteins for quantifying ubiquitin/proteasome-dependent proteolysis in living cells. *Nat Biotechnol* **18**, 538-543 (2000).

38. Kulathu, Y. & Komander, D. Atypical ubiquitylation - the unexplored world of polyubiquitin beyond Lys48 and Lys63 linkages. *Nat Rev Mol Cell Biol* **13**, 508-523 (2012).
39. Heap, R.E., Gant, M.S., Lamoliatte, F., Peltier, J. & Trost, M. Mass spectrometry techniques for studying the ubiquitin system. *Biochem. Soc. Trans.* (2017).
40. Wang, X. *et al.* Mass spectrometric characterization of the affinity-purified human 26S proteasome complex. *Biochemistry* **46**, 3553-3565 (2007).
41. Finley, D., Chen, X. & Walters, K.J. Gates, Channels, and Switches: Elements of the Proteasome Machine. *Trends Biochem Sci* **41**, 77-93 (2016).
42. Wang, X. *et al.* The Proteasome-Interacting Ecm29 Protein Disassembles the 26S Proteasome in Response to Oxidative Stress. *J Biol Chem* (2017).
43. Györfy, B. *et al.* An online survival analysis tool to rapidly assess the effect of 22,277 genes on breast cancer prognosis using microarray data of 1,809 patients. *Breast Cancer Res Treat* **123**, 725-731 (2010).
44. Miettinen, T.P. & Bjorklund, M. Mevalonate Pathway Regulates Cell Size Homeostasis and Proteostasis through Autophagy. *Cell reports* **13**, 2610-2620 (2015).
45. Lawless, C. *et al.* Quantitative assessment of markers for cell senescence. *Exp Gerontol* **45**, 772-778 (2010).
46. Guo, X. *et al.* Site-specific proteasome phosphorylation controls cell proliferation and tumorigenesis. *Nat Cell Biol* **18**, 202-212 (2016).
47. The, I. *et al.* Rb and FZR1/Cdh1 determine CDK4/6-cyclin D requirement in *C. elegans* and human cancer cells. *Nat Commun* **6**, 5906 (2015).
48. Zhang, F., Monkkonen, M., Roth, S. & Laiho, M. TGF-beta induced G(1) cell cycle arrest requires the activity of the proteasome pathway. Transforming growth factor. *Exp Cell Res* **281**, 190-196 (2002).
49. Menu, E. *et al.* A novel therapeutic combination using PD 0332991 and bortezomib: study in the 5T33MM myeloma model. *Cancer Res* **68**, 5519-5523 (2008).
50. Cui, Z., Gilda, J.E. & Gomes, A.V. Crude and purified proteasome activity assays are affected by type of microplate. *Anal Biochem* **446**, 44-52 (2014).
51. Ritorto, M.S., Cook, K., Tyagi, K., Pedrioli, P.G. & Trost, M. Hydrophilic strong anion exchange (hSAX) chromatography for highly orthogonal peptide separation of complex proteomes. *Journal of proteome research* **12**, 2449-2457 (2013).
52. Cox, J. & Mann, M. MaxQuant enables high peptide identification rates, individualized p.p.b.-range mass accuracies and proteome-wide protein quantification. *Nat Biotechnol* **26**, 1367-1372 (2008).
53. Shevchenko, A., Wilm, M., Vorm, O. & Mann, M. Mass spectrometric sequencing of proteins silver-stained polyacrylamide gels. *Analytical Chemistry* **68**, 850-858 (1996).
54. Hjerpe, R. *et al.* Efficient protection and isolation of ubiquitylated proteins using tandem ubiquitin-binding entities. *EMBO Rep.* **10**, 1250-1258 (2009).
55. Huguenin-Dezot, N. *et al.* Synthesis of Isomeric Phosphoubiquitin Chains Reveals that Phosphorylation Controls Deubiquitinase Activity and Specificity. *Cell Rep* **16**, 1180-1193 (2016).

56. MacLean, B. *et al.* Skyline: an open source document editor for creating  
and analyzing targeted proteomics experiments. *Bioinformatics* **26**, 966-  
968 (2010).

## Figure legends

### Figure 1: Thermal proteome profiling of MCF7 breast cancer cells treated with

**palbociclib.** (a) Schematic presentation of the experimental setup. *Left*, MCF7 cells were treated with 10  $\mu$ M palbociclib for 1h after which samples were incubated at temperatures between 37-65°C. Soluble proteins were analyzed from each fraction using quantitative mass spectrometry. *Middle*, Increased levels of 32 abundant thermally stable proteins in raw mass spectrometry data. This set is then used for normalization. The black line displays mean protein levels of the 32 proteins with beige shading displaying 95% confidence interval. The dashed line is the mean levels after normalization with purple shading displaying 95% confidence interval. Western blot displays the levels of one of the thermally stable proteins, SOD1. *Right*, thermal denaturation curves obtained from all proteins in control (blue) and palbociclib (green) treated samples. Dashed lines indicate the standard deviation (SD) of the global denaturation curve (solid line). (b-c) Thermal denaturation curves and Western blots of the main palbociclib targets CDK4 (b) and CDK6 (c) showing thermal stabilization upon palbociclib addition. (d) Palbociclib-induced thermal shifts ( $\Delta T_m$ ) of all identified kinases. (e) Venn diagram displaying the overlap between kinases displaying palbociclib-induced positive  $\Delta T_m$  and kinases identified as direct palbociclib targets by affinity purification<sup>32</sup>.

Data information: In panels b and c data are presented as means  $\pm$  SEM from 3 individual biological replicates.

**Figure 2: Palbociclib activates proteasomal protein degradation.** (a) Plot of MCF7 cell protein complexes displaying palbociclib-induced thermal shifts and changes in the

slope of the melting curve ( $\Delta S$ ). Circled light grey area represents 95% confidence interval for the protein complexes and the outliers, potential targets of palbociclib are indicated. **(b)** Melting temperatures of individual components of the 20S (red squares) and 19S (blue squares) proteasome in control (circled blue area) and palbociclib (circled green area) treated MCF7 cells as a function their molecular weight. Dashed lines connect the corresponding proteasome components in control and palbociclib samples. Insert on the top right displays the  $\Delta T_m$  difference between 20S and 19S proteasome subunits. Insert on the bottom right is a schematic representation of the 26S proteasome. **(c)** Proteasome activity in MCF7 cells as measured using Me4BodipyFL-Ahx<sub>3</sub>Leu<sub>3</sub>VS probe. Cells were treated with the indicated compounds for 1h followed by 1h with the probe. Fluorescence was quantified using flow cytometry ( $n = 4$ ). The top panel displays the fluorescence signal from the probe covalently bound to the proteasome subunits separated on a SDS-PAGE gel. **(d)** MCF7 cell proteasome activity after 30h treatment with indicated chemicals as measured by Me4BodipyFL-Ahx<sub>3</sub>Leu<sub>3</sub>VS probe ( $n = 3-4$ ). **(e)** Dose dependency of Ubi<sup>G76V</sup>-GFP degradation in HeLa cells after 30 h palbociclib treatment. GFP levels were quantified using flow cytometry ( $n = 3$ ). **(f)** Specificity of palbociclib-induced Ub<sup>G76V</sup>-GFP degradation was assessed by treating HeLa cells with the indicated chemicals together with cycloheximide (CHX) for 6 h ( $n = 3-4$ ). The proteasome specificity of GFP degradation was further validated using treatment with 10  $\mu$ M MG-132. **(g)** Western blot analysis of ubiquitin conjugated proteins and 20S proteasomal levels in MCF7 cells. **(h)** Quantification of ubiquitin conjugated protein levels from Western blots in (e) ( $n = 4$ ).

Data information: In panels c, d, f and h data are presented as means  $\pm$  SD; each  $n$  represents an individual biological replicate. P- values were determined by two-tailed



Students' t-test for panel b and by ANOVA and two-tailed Students' t-test with Holm-Sidak post hoc test for panels c, d, f and h; ns depicts not significant ( $p > 0.05$ ).

**Figure 3: Palbociclib activates the proteasome largely independently of the ubiquitin system.** MCF7 cells were treated with 1  $\mu$ M palbociclib and 100 nM bortezomib for 10h, and the ubiquitin linkages were absolutely quantified by targeted PRM mass spectrometry. Data shows the absolute levels of methionine-1 (M1) and all lysine (K6, K11, K27, K29, K48 and K63) linkages ( $n = 3$ ). Data are presented as means  $\pm$  SEM; each n represents an individual biological replicate; P-values were determined by two-tailed Students' t-test; ns depicts not significant ( $p > 0.05$ ); \*:  $p < 0.05$ ; \*\*:  $p < 0.01$ ; \*\*\*:  $p < 0.001$ ; \*\*\*\*:  $p < 0.0001$ .

**Figure 4: Palbociclib activates the proteasome indirectly and reduces the association of ECM29 with the proteasome. (a)** *In vitro* 20S proteasome activity assay with peptide substrates in the presence of 5  $\mu$ M palbociclib or 10 nM bortezomib shows that palbociclib does not inhibit the proteasome directly. **(b)** Proteasome activity levels, as measured by Me4BodipyFL-Ahx<sub>3</sub>Leu<sub>3</sub>VS probe, after siRNA mediated CDK4/6 knockdown and palbociclib in HeLa and MCF7 cells ( $n = 3-4$ ). Knockdown efficiency was analyzed by Western blotting. This data indicates that proteasome activation is likely independent of CDK4/6 inhibition through palbociclib. **(c)** Same as (b), but siRNAs targeted RB1 in HeLa cells ( $n = 3$ ). **(d)** Workflow schematic of the mass spectrometry based analysis of proteasome activation mechanism. Palbociclib (10  $\mu$ M) and Torin-1 (1  $\mu$ M) treatments of MCF7 cells lasted 4h ( $n = 3$ ). **(e)** Volcano plots showing abundance changes and statistical significances for proteasome subunit levels



in palbociclib (left) and Torin1 (right) treated MCF7 cells. Proteasomes show significantly reduced levels of ECM29 upon palbociclib treatment.

Data information: In panels a, b and c data are presented as means  $\pm$  SD; each  $n$  represents an individual biological replicate. P- value for panel c was determined by two-tailed Students' t-test; ns depicts not significant ( $p > 0.05$ ).

**Figure 5: ECM29 mediates palbociclib-induced proteasomal activation and may function as a putative biomarker for palbociclib treatment efficacy in breast cancer.**

**(a)** Proteasome activity, as measured by Me4BodipyFL-Ahx<sub>3</sub>Leu<sub>3</sub>VS probe, after siRNA-mediated knockdown of ECM29 and subsequent 6h treatment with palbociclib (1  $\mu$ M) or Torin-1 (0.1  $\mu$ M) in MCF7 cells ( $n = 4$ ). Data shows that palbociclib induced proteasome activation is dependent on ECM29. **(b)** Proteasomal activity as measured using Ubi<sup>G76V</sup>-GFP degradation. Palbociclib concentration was 1  $\mu$ M, bortezomib 50 nM ( $n = 3-4$ ). **(c)** Proliferation of WT and ECM29<sup>+/-</sup> MCF7 cells ( $n = 3$ ) shows that partial loss of ECM29 reduces proliferation. Western blot levels of ECM29 and GAPDH are shown as insert. **(d)** Senescence staining of wild-type (WT) MCF7 cells and ECM29 heterozygous CRISPR mutant MCF7 cells (ECM29<sup>+/-</sup>) shows increased senescence in ECM29<sup>+/-</sup> cells ( $n = 3-4$ ). Note, that much like palbociclib treatment, the partial loss of ECM29 also increases cell size significantly. Scale bar is 100  $\mu$ m. **(e)** Kaplan-Meier relapse-free survival for all analyzed breast cancer patients with above (high ECM29) or below (low ECM29) median levels of ECM29 mRNA ( $n = 3554$ ). Hazard ratio and logrank P value are shown at bottom left. **(f)** Same as (e) but only HER2/neu positive breast cancer ( $n = 84$  in both groups). **(g)** Same as (e) but only those with receiving endocrine therapy ( $n = 999$ ).

Data information: In panels a, b, c and d data are presented as means  $\pm$  SD; each  $n$  represents an individual biological replicate. P- values for panels a and b were determined by ANOVA and two-tailed Students' t-test with Holm-Sidak post hoc test; p- value for panel d was determined by two-tailed Students' t-test; ns depicts not significant ( $p > 0.05$ ). For panels e, f and g the logrank p-values were provided by the KMplot online service <sup>43</sup>.

**Figure 6: High proteasomal activity is involved in the palbociclib-induced G1**

**arrest. (a)** MCF7 cells were treated with 1  $\mu$ M palbociclib for 0, 6 or 30h to examine levels of endogenous proteins in response to palbociclib-induced protein degradation.

Additionally, a second set of cells were additionally treated with 10  $\mu$ M MG-132 for the last 1 h before sample collection to inhibit the proteasome. HMGCR and CDK4 protein levels are reduced by palbociclib treatment. **(b)** Protein levels of CDK4 were quantified from the Western blot samples ( $n = 4$ ). **(c)** Top, workflow schematic of cell cycle synchronization and analysis of cell cycle progression. Bottom, representative

DNA histograms of each sample at the time of analysis from MCF7 cells. Palbociclib prevents progression beyond the G1 phase which can be overridden by addition of

bortezomib. **(d-e)** Quantification of cell cycle status after G1 cell cycle synchronization and 15h with 1  $\mu$ M palbociclib with or without bortezomib treatment in MCF7 cells **(d)**

( $n = 4$ ) and T47D cells **(e)** ( $n = 3$ ). **(f)** Proteasome activity levels, as measured by

Me4BodipyFL-Ahx<sub>3</sub>Leu<sub>3</sub>VS probe, in wild type (WT) and palbociclib resistant (Resistant) MCF7 and T47D cells ( $n = 4$ ). **(g)** Same as (f), but data is from MCF7 and

T47D cells after 6h treatment with 1  $\mu$ M palbociclib. The data has been normalized to each control to enable comparison of the relative proteasome activation caused by palbociclib ( $n = 4$ ).

Data information: In panels b, d, e, f and g data are presented as means  $\pm$  SD; each  $n$  represents an individual biological replicate. P- values were determined by ANOVA and two-tailed Students' t-test with Holm-Sidak post hoc test; ns depicts not significant ( $p > 0.05$ ); \*:  $p < 0.05$ ; \*\*:  $p < 0.01$ ; \*\*\*:  $p < 0.001$ .

**Figure 7 Proteasomal inhibition suppresses palbociclib-induced senescence phenotype. (a)** Representative maximum-intensity projections of MCF7 cells treated with the 1  $\mu$ M palbociclib and/or 7.5 nM bortezomib. Note that 7.5 nM Bortezomib inhibits proteasome only partially. Fixed and permeabilized cells were stained with Alexa Fluor 488 conjugated Ki67 antibody, Alexa Fluor 647 conjugated phospho-Histone H2A.X ( $\gamma$ H2AX) (pSer139) antibody and DAPI. All images were acquired with the same magnification, scale bar is 20  $\mu$ m. **(b-d)** Flow cytometry based quantifications of cell size **(b)**, Ki67 levels **(c)** and pSer139  $\gamma$ H2AX levels **(d)** from the samples presented in panel (a) ( $n = 4$ ). **(e)** Senescence associated beta-galactosidase activity (blue staining) in MCF7 cells untreated (control) or treated with 7.5 nM bortezomib, 1  $\mu$ M palbociclib or a combination of both. Scale bar is 50  $\mu$ m. **(f)** Quantification of the beta-galactosidase activity levels shown in panel (e) ( $n = 4$ ). **(g)** Schematic model of palbociclib action on cell cycle and cell senescence.

Data information: In panels b, c, d and f data are presented as means  $\pm$  SD; each  $n$  represents an individual biological replicate. P- values were determined by ANOVA and two-tailed Students' t-test with Holm-Sidak post hoc test; ns depicts not significant ( $p > 0.05$ ); \*\*:  $p < 0.01$ ; \*\*\*:  $p < 0.001$ .

# Figure 1.

a

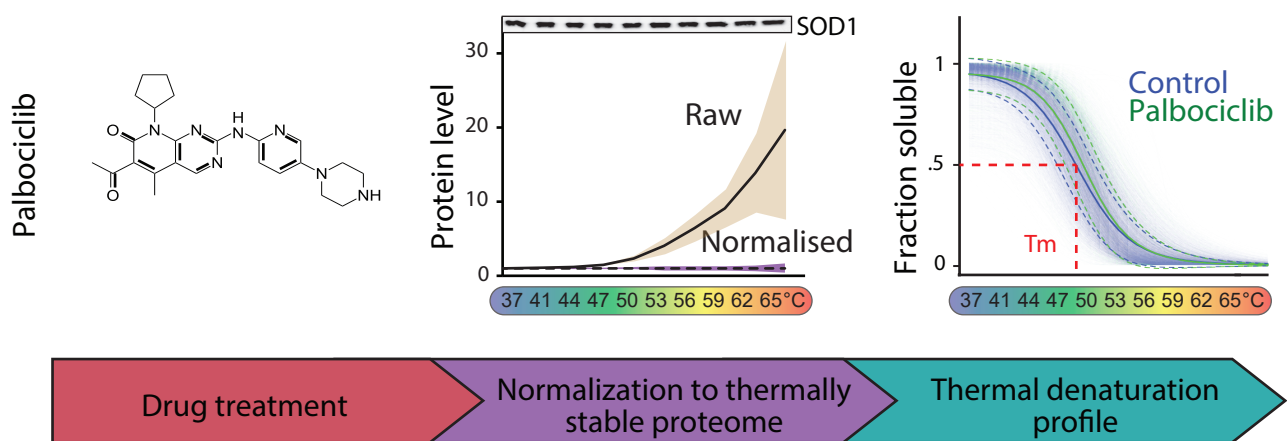

b

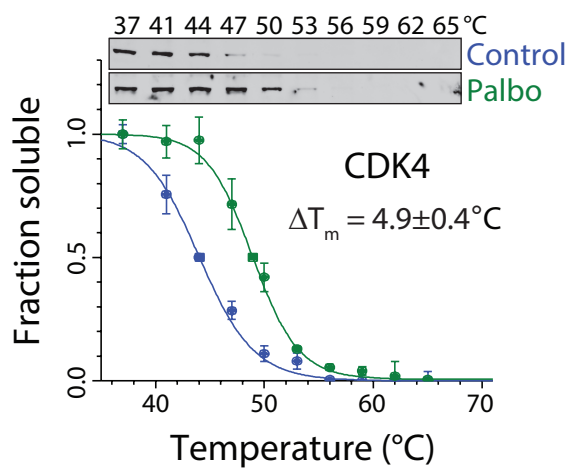

c

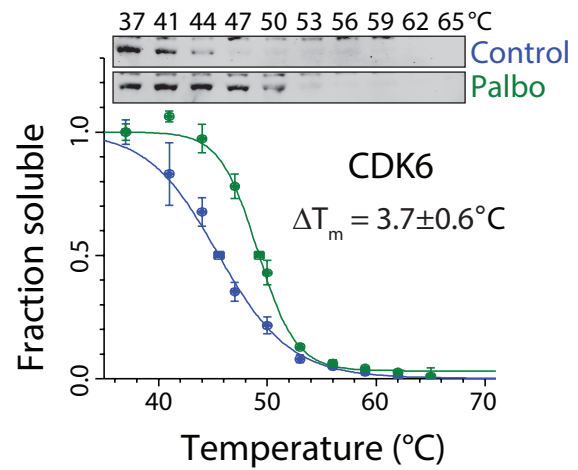

d

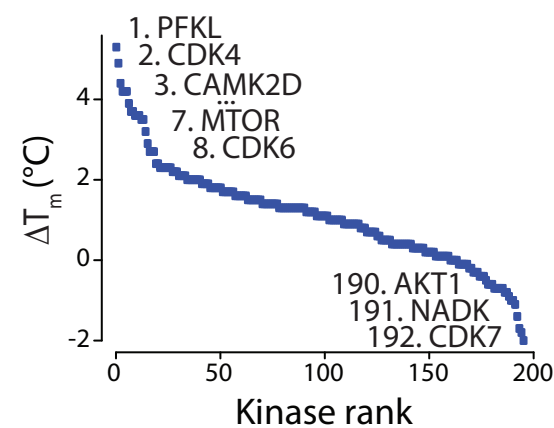

e

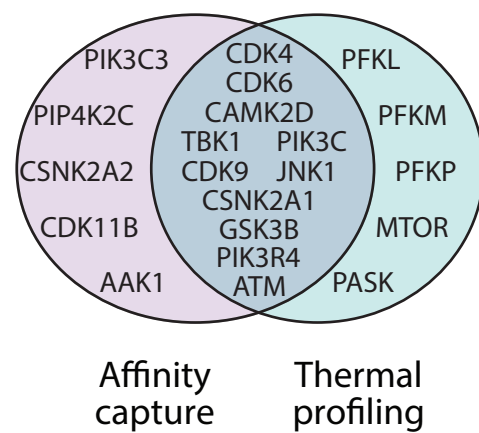

Figure 2.

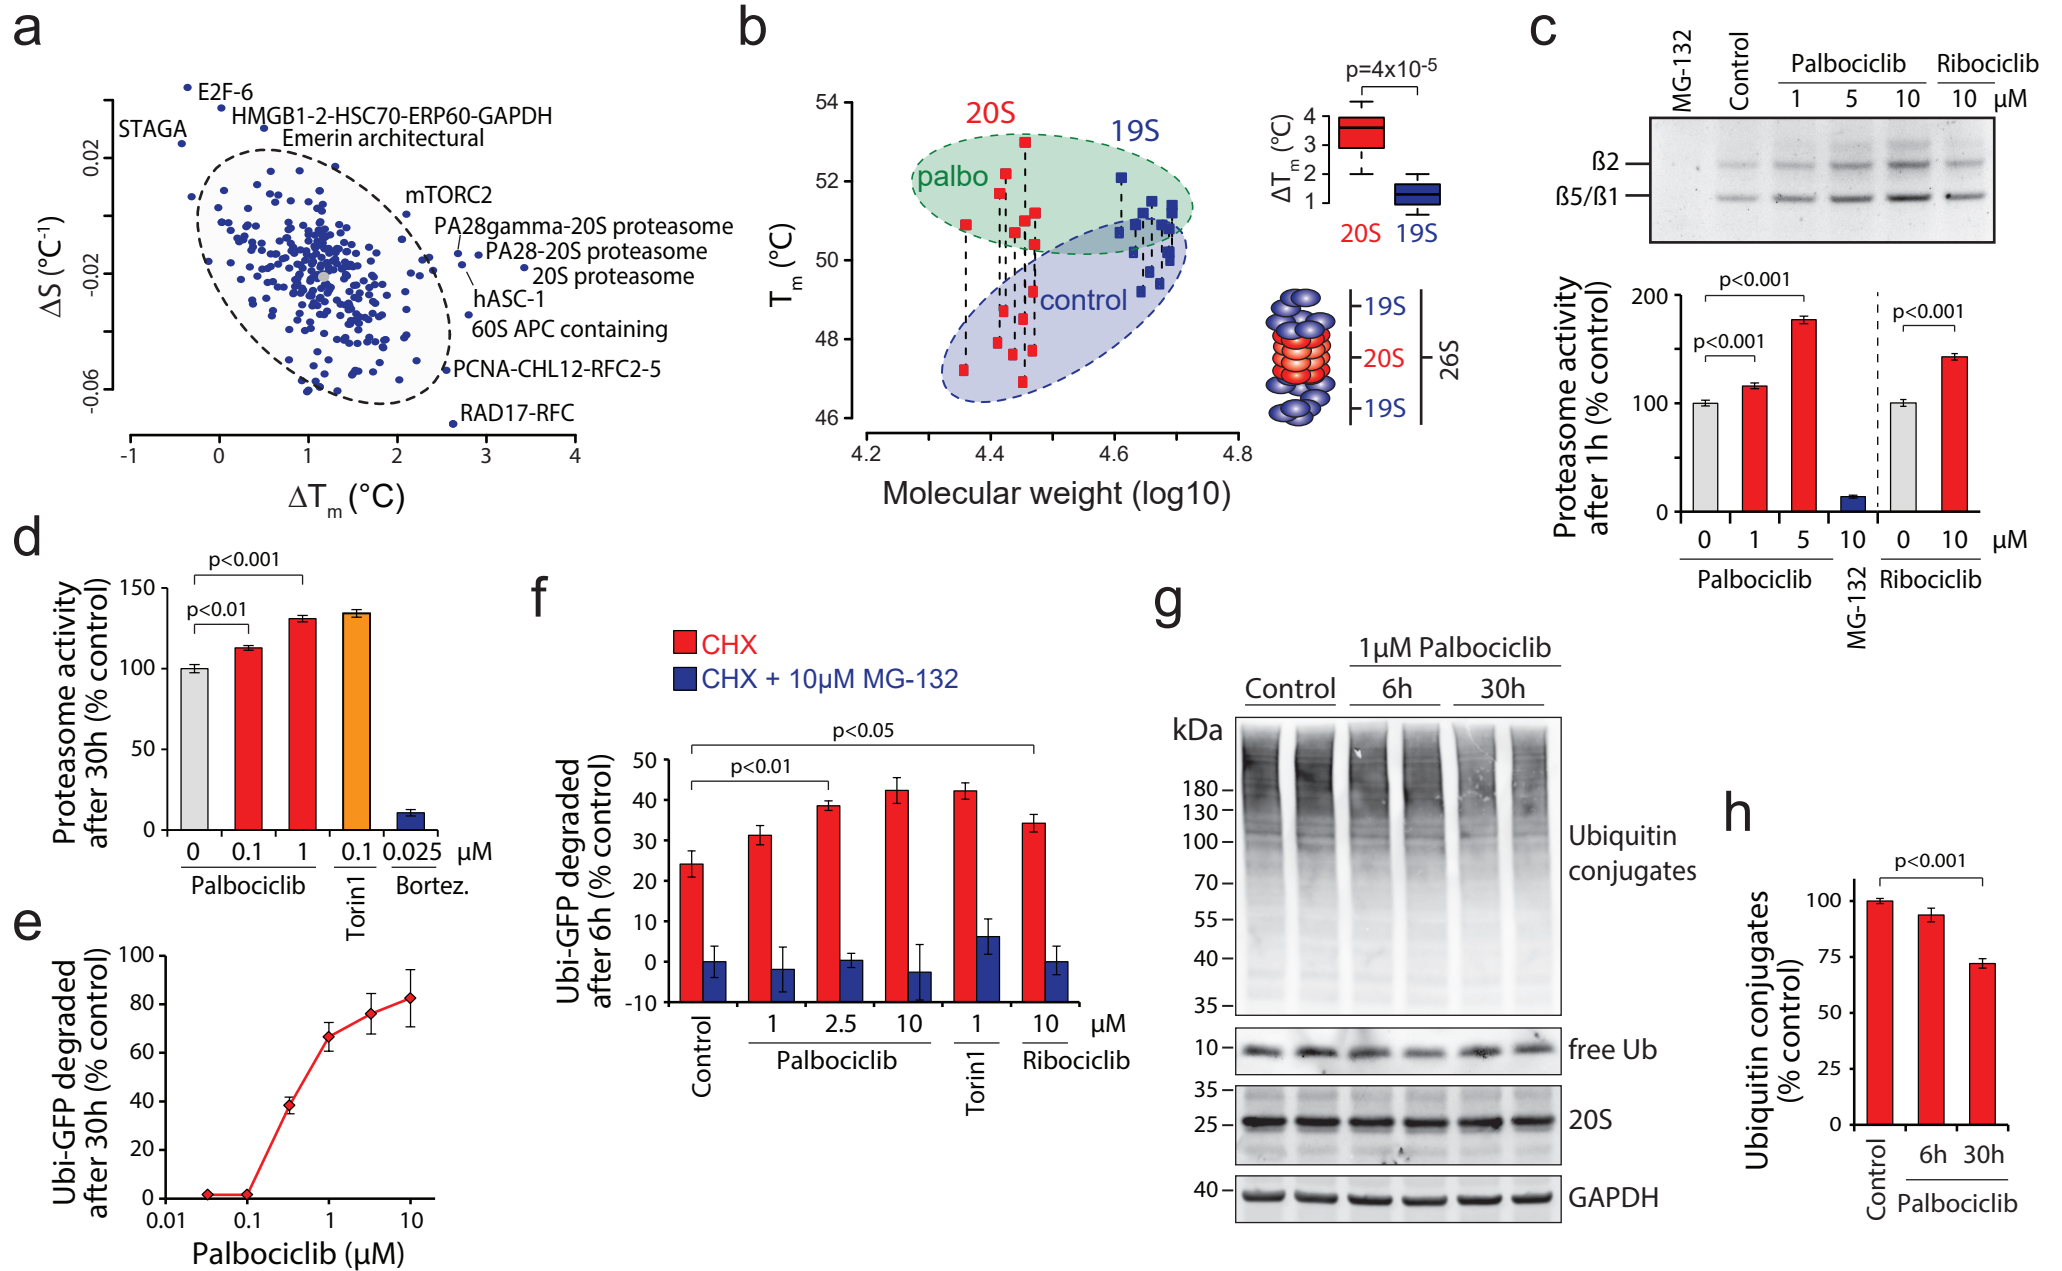

## Figure 3.

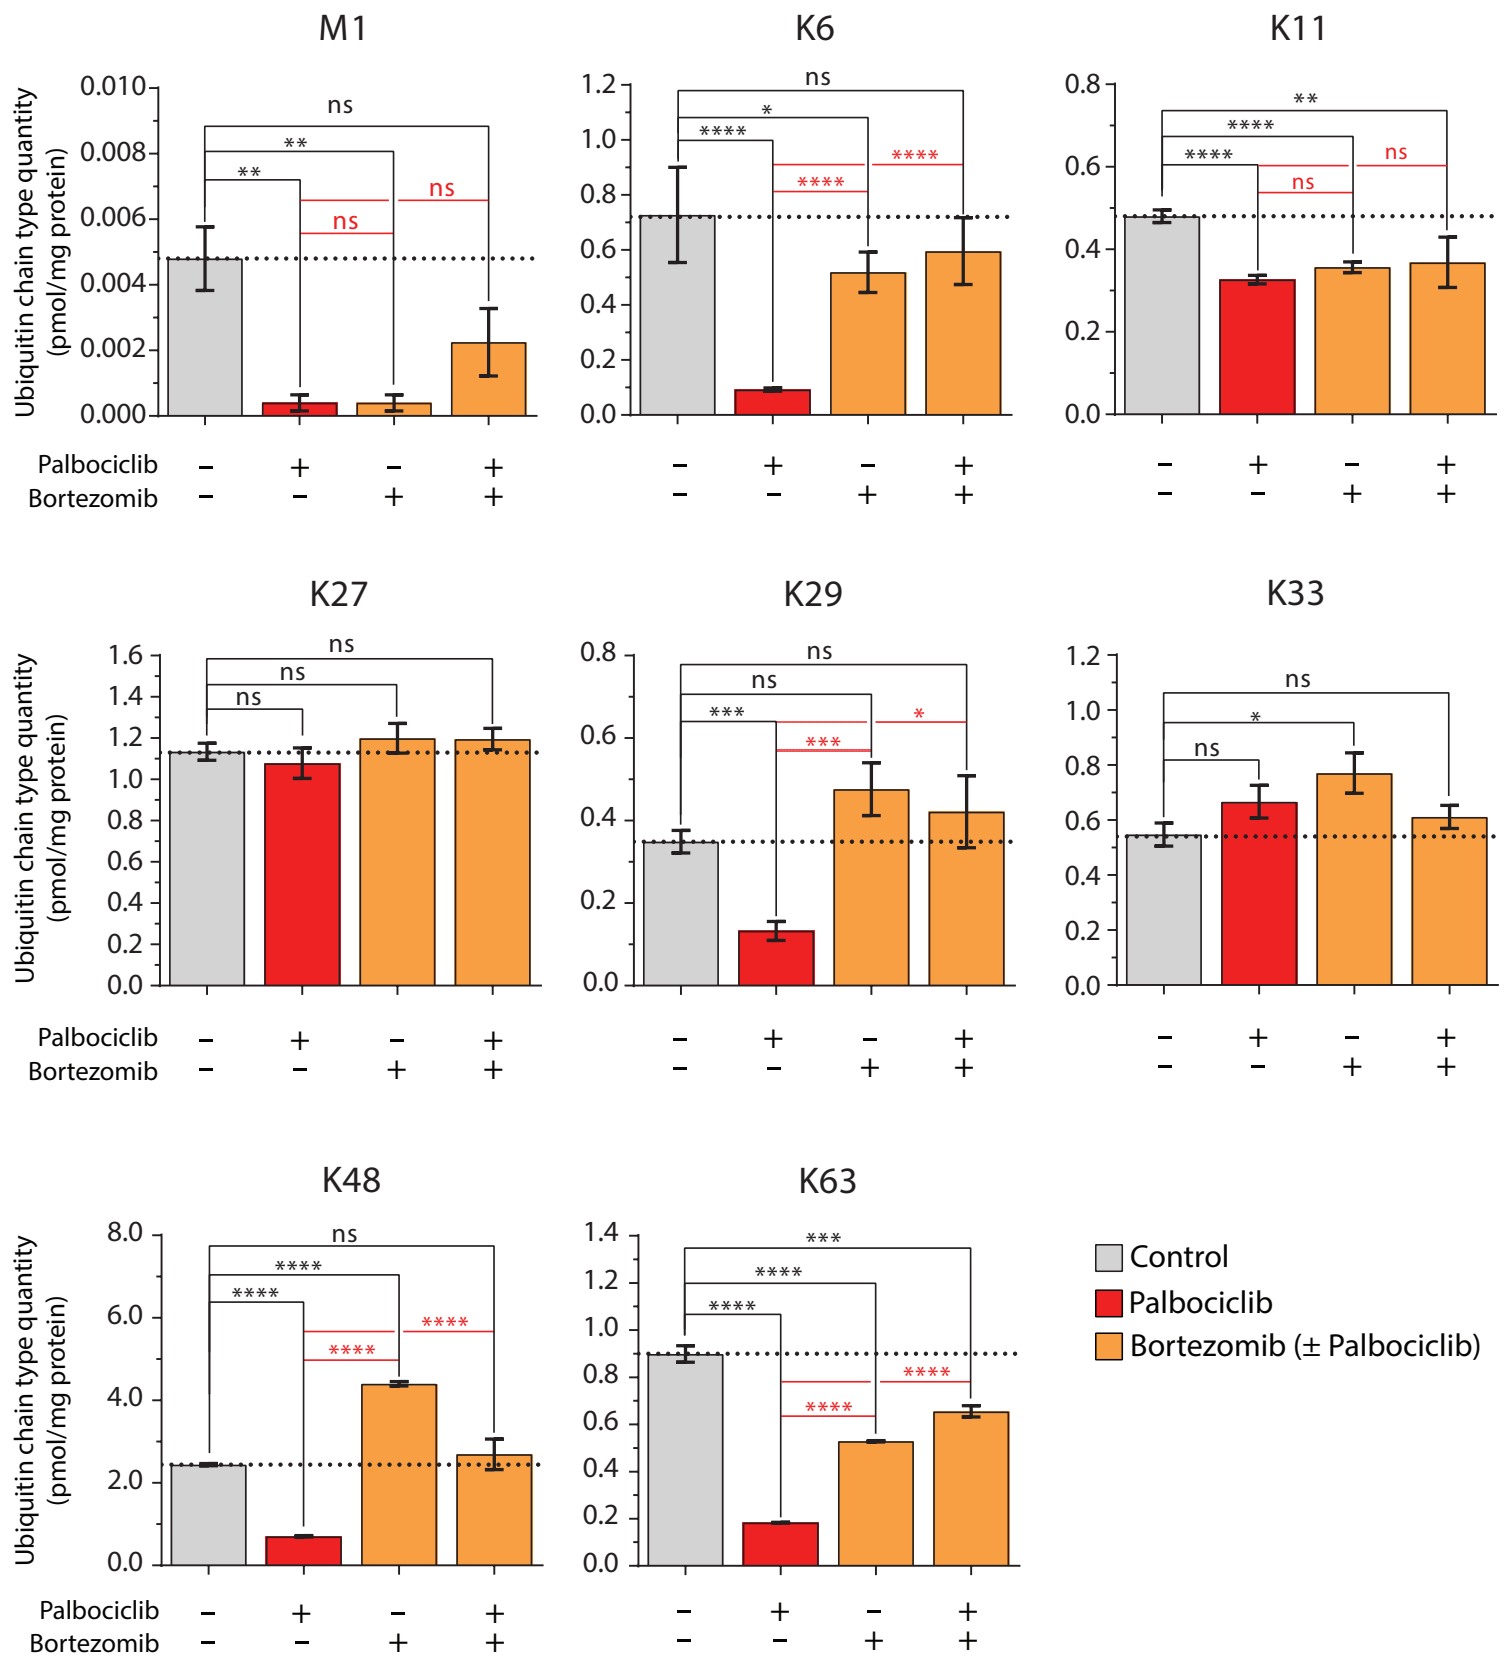

## Figure 4.

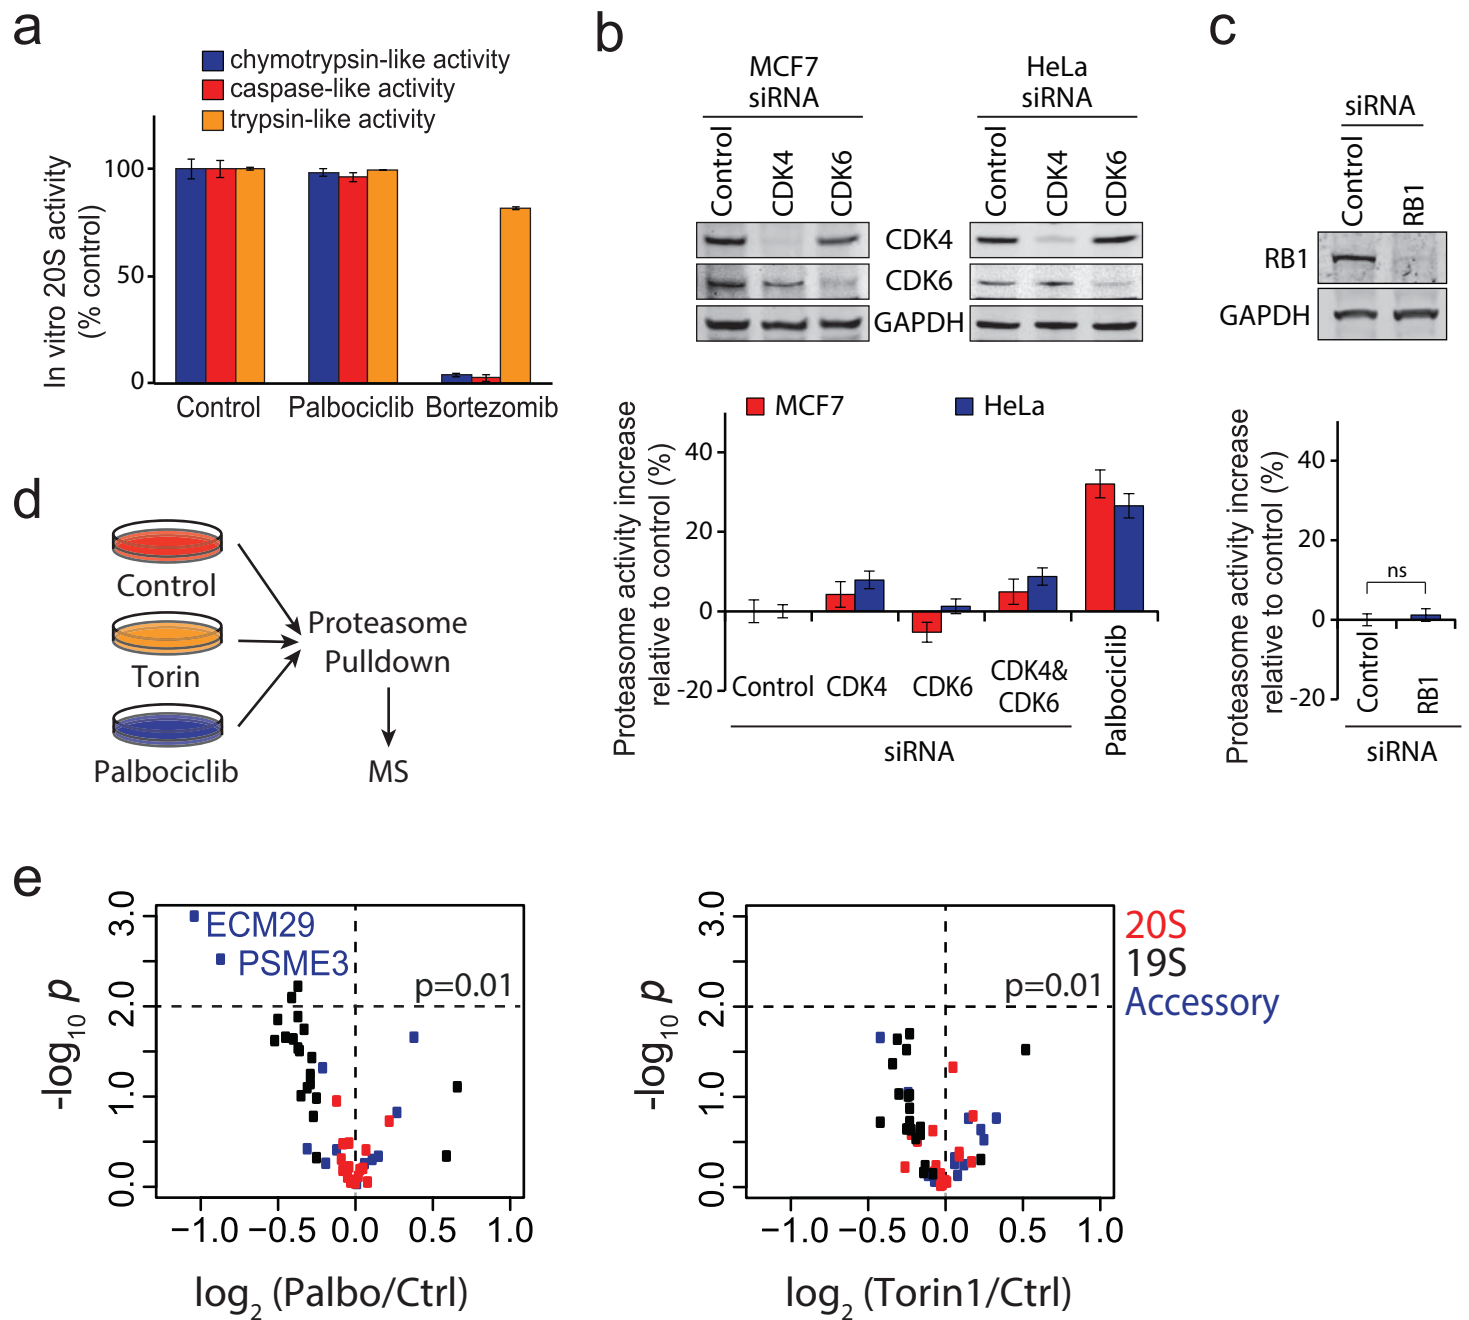

## Figure 5.

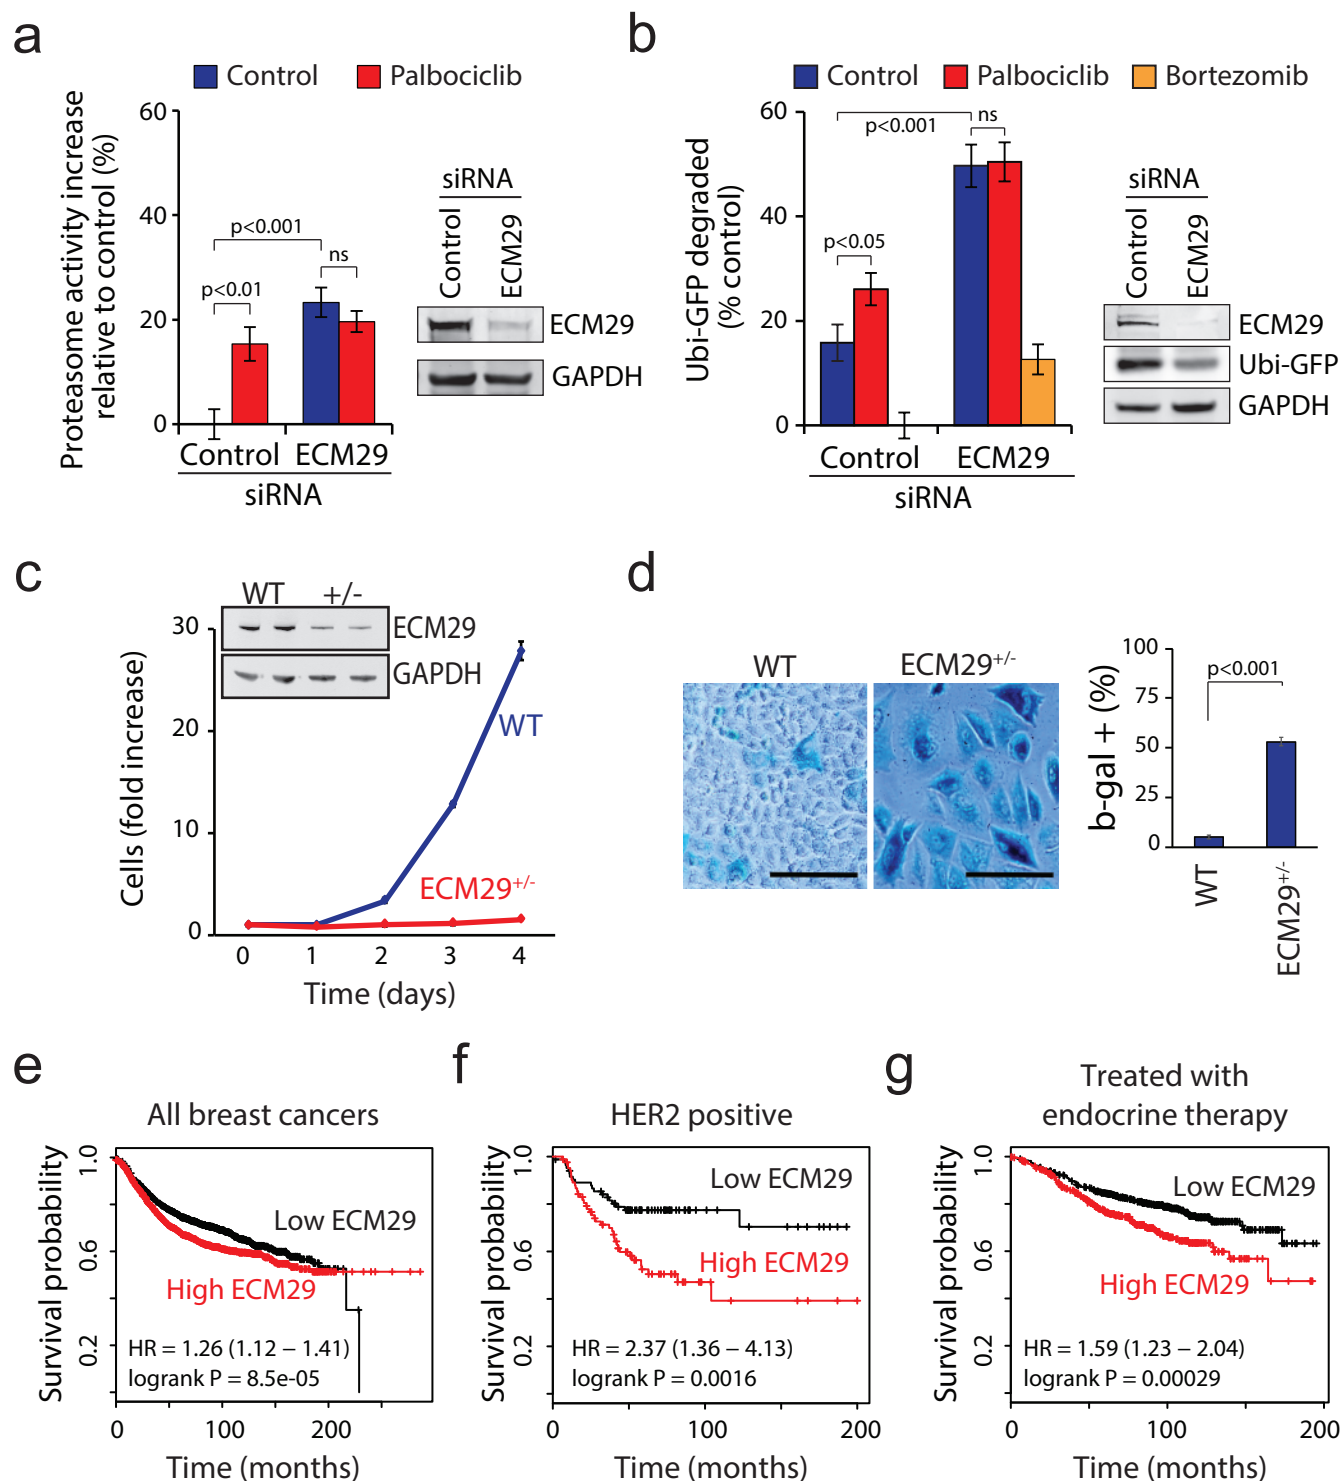



# Figure 6.

**a**

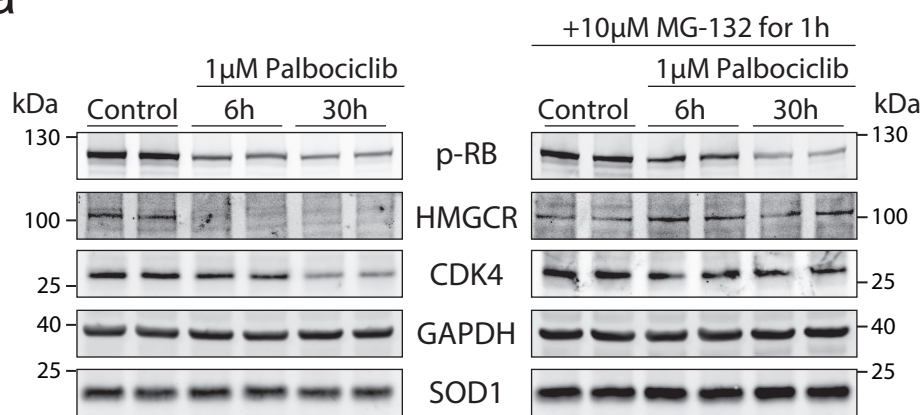

**b**

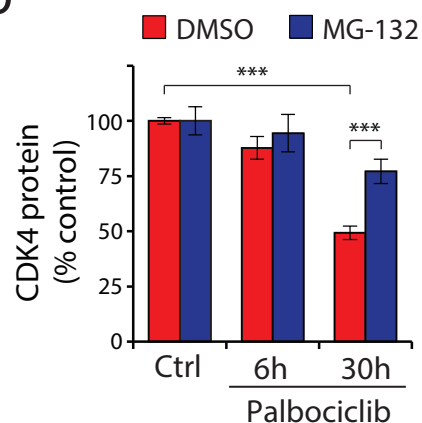

**c**

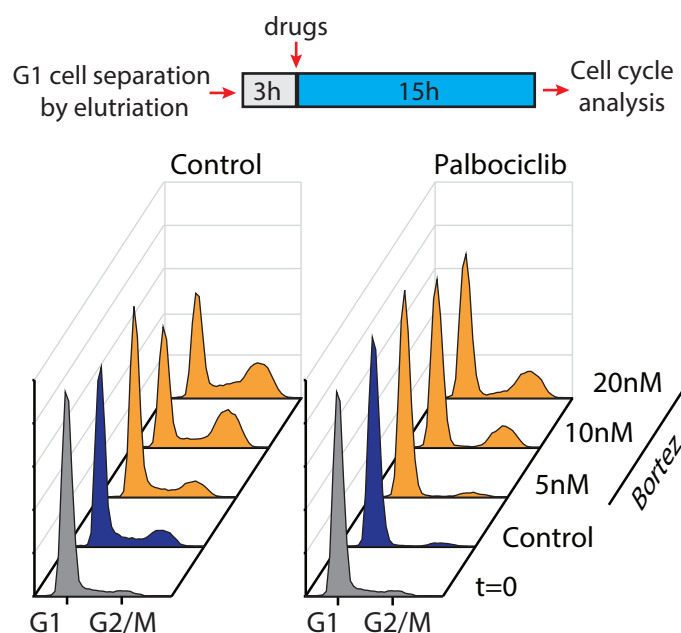

**d**

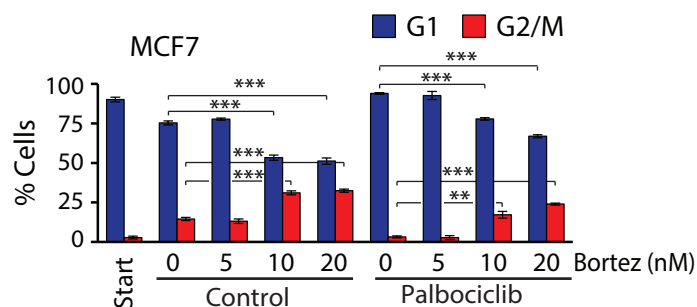

**e**

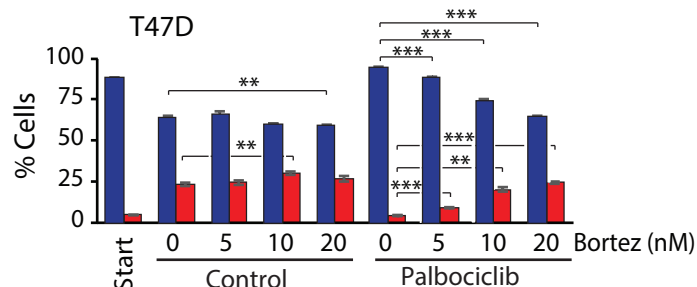

**f**

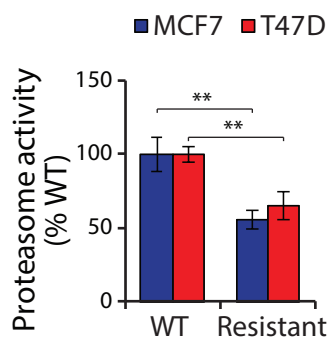

**g**

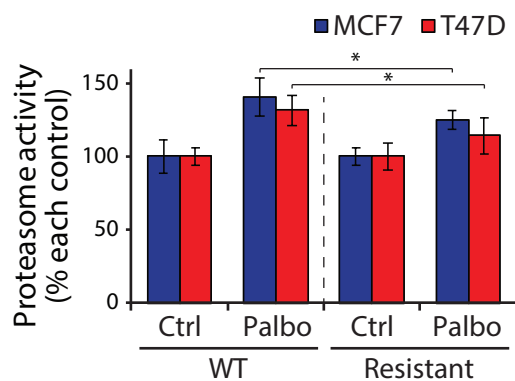

## Figure 7.

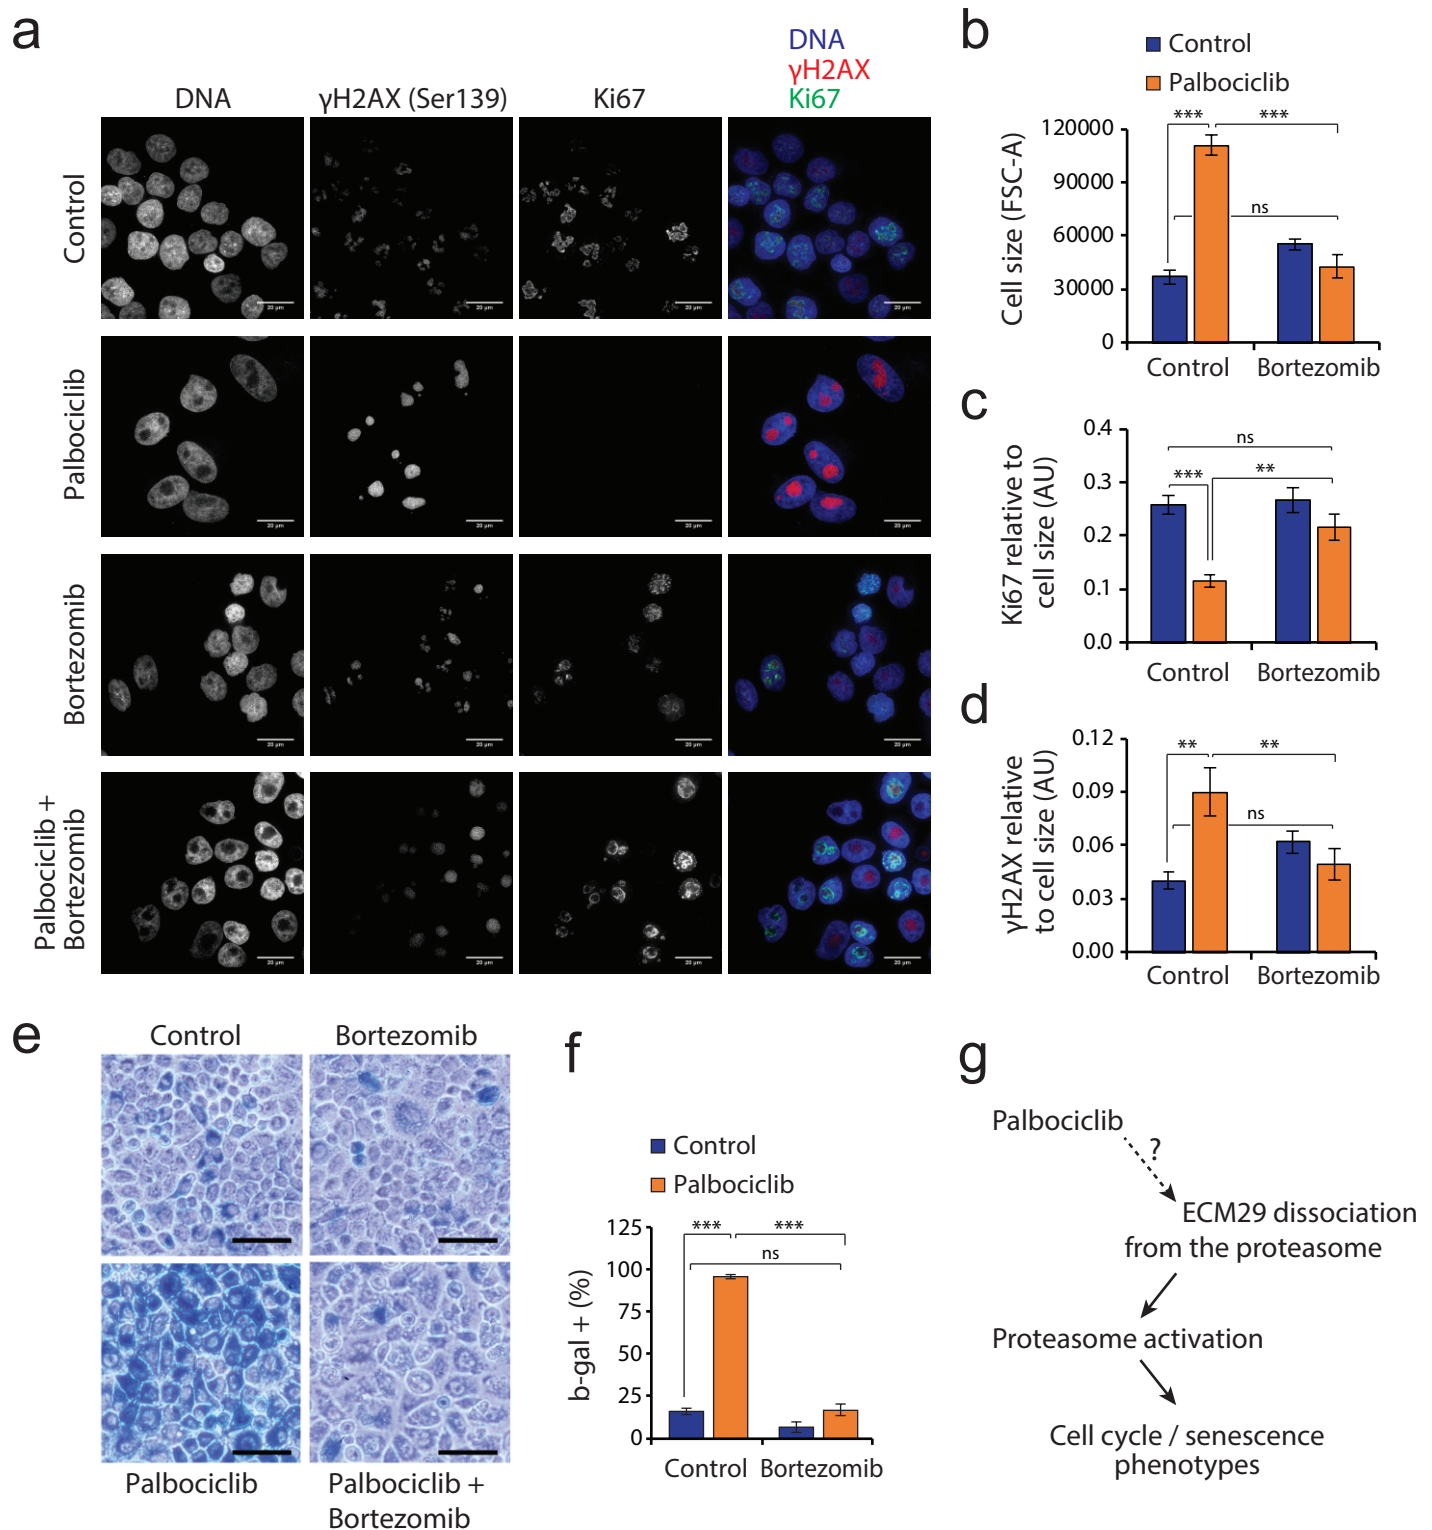

Source: https://www.biorxiv.org/content/10.1101/202770v1.full.pdf
